# Supplementary material for: Iodine-catalyzed regioselective thiolation of imidazo[1,2-a]pyridines using sulfonyl hydrazides as a thiol surrogate
Source: Royal Society of Chemistry journal article supplement (doi:10.1039/c5ob00033e), 2015-01-01
Supplement: c5ob00033e1.pdf [file c5ob00033e1.pdf]

# Supporting Information

## Iodine-catalyzed regioselective thiolation of imidazo[1,2-*a*]pyridines using sulfonyl hydrazides as a thiol surrogate

Avik Kumar Bagdi,<sup>a</sup> Shubhanjan Mitra,<sup>a</sup> Monoranjan Ghosh <sup>a</sup> and Alakananda Hajra\*<sup>a</sup>

<sup>a</sup>*Department of Chemistry, Visva-Bharati, Santiniketan-731235, India*

E-mail: [alakananda.hajra@visva-bharati.ac.in](mailto:alakananda.hajra@visva-bharati.ac.in)

## Table of Contents

|                                                                          |      |
|--------------------------------------------------------------------------|------|
| General experimental methods .....                                       | 2    |
| Experimental procedure for synthesis of compounds <b>3aa</b> .....       | 2    |
| Experimental procedure for synthesis of compounds <b>5 &amp; 7</b> ..... | 2-3  |
| <sup>1</sup> H and <sup>13</sup> C NMR spectra for all compounds .....   | 5-46 |

**General:**  $^1\text{H}$  NMR spectra were determined on a Bruker 400 (400 MHz) spectrometer as solutions in  $\text{CDCl}_3$ . Chemical shifts are expressed in parts per million ( $\delta$ ) and are referenced to tetramethylsilane (TMS) as internal standard and the signals were reported as s (singlet), d (doublet), t (triplet), m (multiplet) and coupling constants  $J$  were given in Hz.  $^{13}\text{C}$  NMR spectra were recorded at 100 MHz in  $\text{CDCl}_3$  solution. All reactions were carried out in open air conditions. TLC was done on silica gel coated glass slide (Merck, Silica gel G for TLC). Silica gel (60-120 mesh, SRL, India) was used for column chromatography. Petroleum ether refers to the fraction boiling in the range of 60-80  $^\circ\text{C}$  unless otherwise mentioned. All solvents were dried and distilled before use. Solvents, reagents and chemicals were purchased from Aldrich. All the imidazopyridines were synthesized by following reported methodology.<sup>1</sup>

**1. Typical procedure for the synthesis of 2-phenyl-3-*p*-tolylsulfanyl-imidazo[1,2-*a*]pyridine (3aa):**

To a solution of 2-phenyl-imidazo[1,2-*a*]pyridine **1a** (97 mg, 0.5 mmol) in ethanol (0.1 mL), *p*-toluene sulfonylhydrazide **2a** (110 mg, 0.6 mmol) and  $\text{I}_2$  (20 mol-%) was added. The mixture was stirred at 70  $^\circ\text{C}$  for 10 h (TLC). After completion, the reaction mixture was cooled to room temperature and ethanol was evaporated. Subsequently, the mixture was extracted with dichloromethane (5 mL) followed by washing with brine (3 mL). The combined organic phases were dried over anhydrous  $\text{Na}_2\text{SO}_4$ . The crude product was concentrated in vacuo and was purified by column chromatography on silica gel using petroleum ether/ethylacetate (15:1 to 10:1) as eluent.

**2. Typical procedure for the synthesis of 6-phenyl-5-(*p*-tolylthio)imidazo[2,1-*b*]thiazole (5aa):**

A mixture of 2-phenyl-imidazo[1,2-*a*]thiazole **4a** (100 mg, 0.5 mmol) and *p*-toluene sulfonylhydrazide **2a** (110 mg, 0.6 mmol) was stirred in presence of  $\text{I}_2$  (20 mol%) in ethanol (0.1 mL) at 70  $^\circ\text{C}$  for 10h (TLC). After completion, the reaction mixture was cooled to room temperature and extracted with dichloromethane (5 mL) followed by washing with brine (3 mL) and dried over  $\text{Na}_2\text{SO}_4$ . After evaporation of solvent the crude product was purified by column chromatography on silica gel using petroleum ether/ethylacetate as eluent.

**3. Typical procedure for the synthesis of 2-Phenyl-3-*p*-tolylsulfanyl-benzo[*d*]imidazo[2,1-*b*]thiazole (7aa):**

A mixture of 2-phenyl-benzo[*d*]imidazo[2,1-*b*]thiazole **6a** (125 mg, 0.5 mmol) and *p*-toluene sulfonylhydrazide **2a** (110 mg, 0.6 mmol) was stirred in presence of I<sub>2</sub> (20 mol%) in ethanol (0.1 mL) at 70 °C for 10h (TLC). After completion, the reaction mixture was cooled to room temperature and extracted with dichloromethane (5 mL) followed by washing with brine (3 mL) and dried over Na<sub>2</sub>SO<sub>4</sub>. After evaporation of solvent the crude product was purified by column chromatography on silica gel using petroleum ether/ethylacetate as eluent.

## **$^1\text{H}$ and $^{13}\text{C}$ NMR spectra**

8.187  
8.175  
8.173  
8.170  
8.139  
8.135  
8.117  
8.115  
7.650  
7.648  
7.628  
7.625  
7.569  
7.566  
7.548  
7.529  
7.524  
7.500  
7.296  
7.278  
7.260  
7.244  
7.230  
7.226  
7.207  
7.204  
7.168  
6.936  
6.916  
6.830  
6.825  
6.813  
6.809  
6.777  
6.775  
6.760  
6.758  
6.743  
6.741

2.163

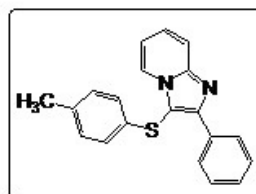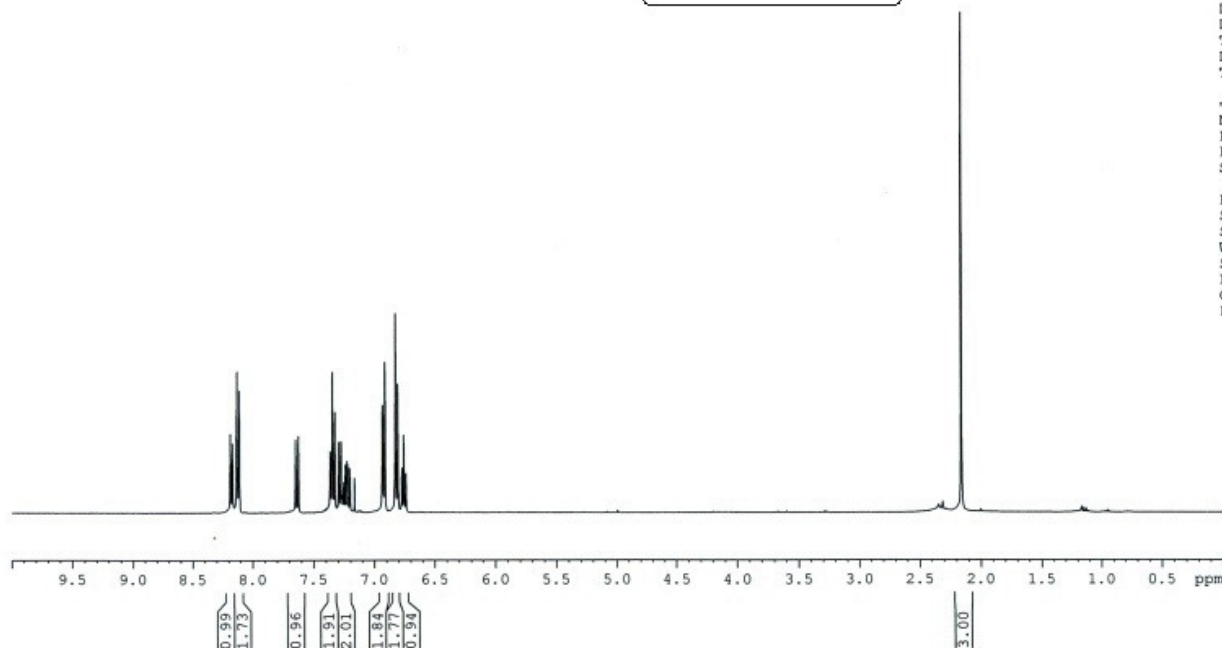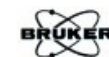

Current Data Parameters  
NAME Dr. A HAJRA 2014  
EXPNO 731  
PROCNO 1

F2 - Acquisition Parameters  
Date\_ 20140815  
Time 19.44  
INSTRUM spect  
PROBHD 5 mm PABBO BB/  
PULPROG zg30  
TD 32768  
SOLVENT CDC13  
NS 24  
DS 2  
SWH 8223.685 Hz  
FIDRES 0.250967 Hz  
AQ 1.9923444 sec  
RG 62.69  
DW 60.800 usec  
DE 6.50 usec  
TE 296.5 K  
D1 1.00000000 sec  
TD0 1

----- CHANNEL f1 -----  
NUC1 1H  
P1 14.75 usec  
PLW1 11.99499989 W  
SFO1 400.1524711 MHz

F2 - Processing parameters  
SI 16384  
SF 400.1500456 MHz  
WDW EM  
SSB 0  
LB 0.30 Hz  
GB 0  
PC 1.00

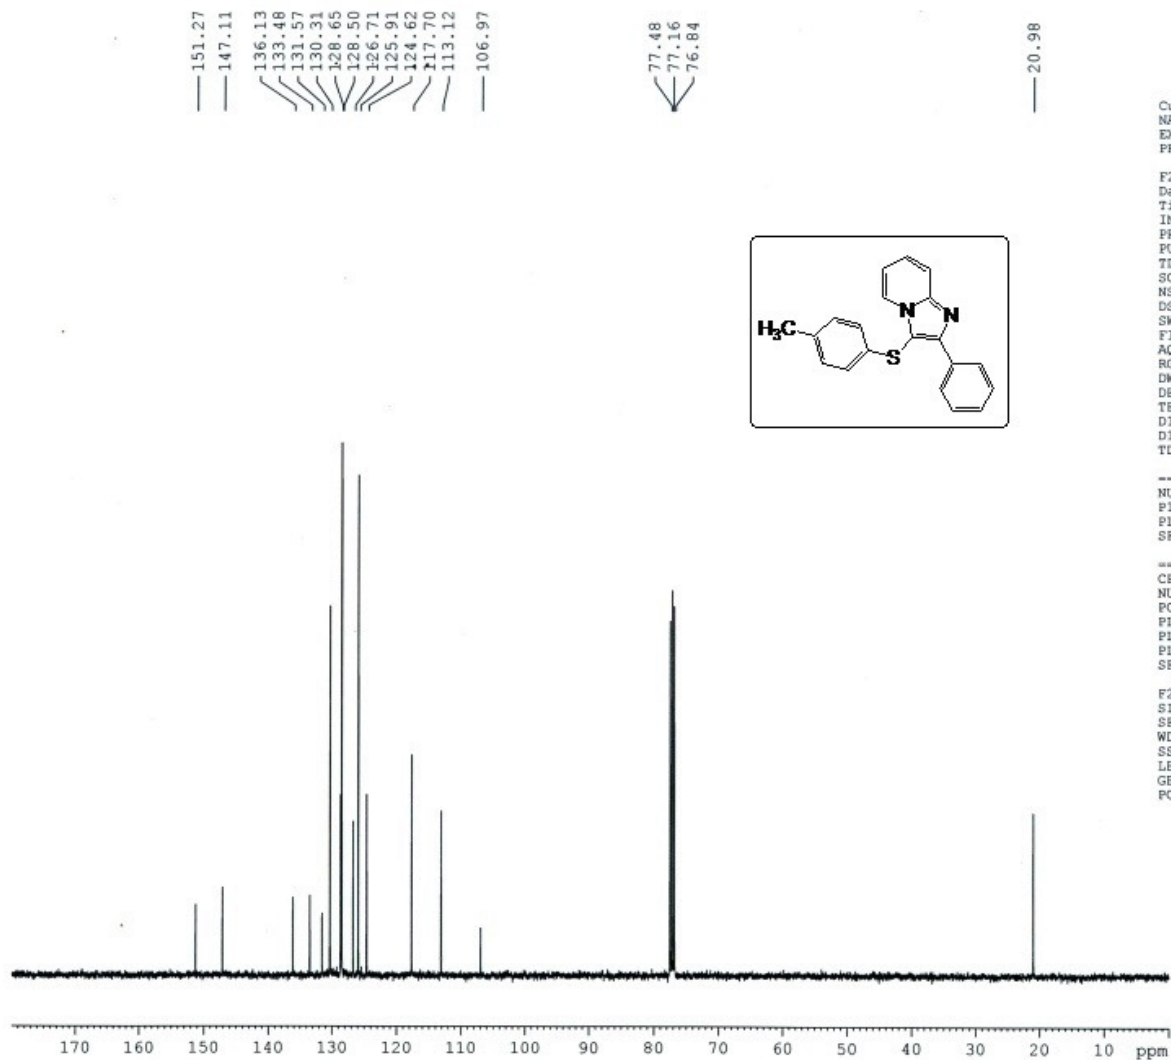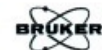

Current Data Parameters  
 NAME Dr. A HAJRA 2014  
 EXPNO 735  
 PROCNO 1

F2 - Acquisition Parameters  
 Date\_ 20140815  
 Time 20.14  
 INSTRUM spect  
 PROBHD 5 mm PABBO BB/  
 PULPROG zgpg30  
 TD 32768  
 SOLVENT CDCl3  
 NS 240  
 DS 2  
 SWH 24038.461 Hz  
 FIDRES 0.733596 Hz  
 AQ 0.6816244 sec  
 RG 62.69  
 DW 20.800 usec  
 DE 6.50 usec  
 TE 297.2 K  
 D1 2.00000000 sec  
 D11 0.03000000 sec  
 TD0 1

----- CHANNEL f1 -----  
 NUC1 13C  
 P1 8.90 usec  
 PLW1 54.00000000 W  
 SFO1 100.6278588 MHz

----- CHANNEL f2 -----  
 CPDPRG2 waltz16  
 NUC2 1H  
 PCPD2 80.00 usec  
 PLW2 12.00000000 W  
 PLW12 0.40792999 W  
 PLW13 0.26107001 W  
 SFO2 400.1516006 MHz

F2 - Processing parameters  
 SI 16384  
 SF 100.6177894 MHz  
 WDW EM  
 SSB 0  
 LB 1.00 Hz  
 GB 0  
 PC 1.40

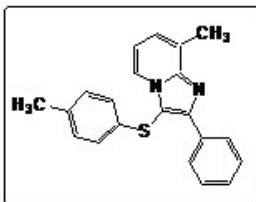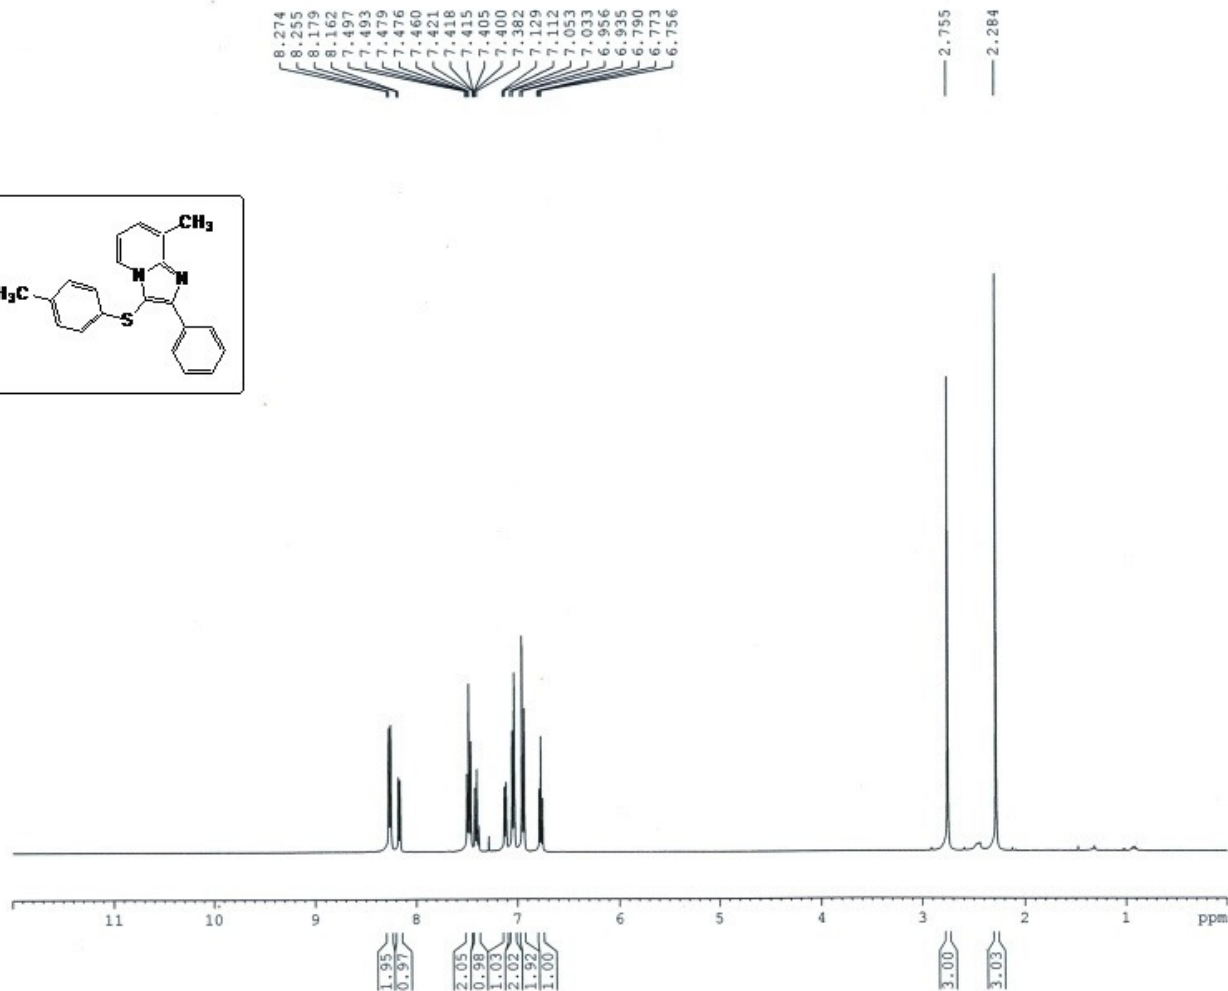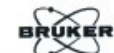

Current Data Parameters  
NAME Dr. A HAJRA 2014  
EXPNO 661  
PROCNO 1

F2 - Acquisition Parameters  
Date\_ 20140801  
Time\_ 10.24  
INSTRUM spect  
PROBHD 5 mm PABBO BB/  
PULPROG zg30  
TD 32768  
SOLVENT CDCl3  
NS 24  
DS 2  
SWH 8223.685 Hz  
FIDRES 0.250967 Hz  
AQ 1.9923444 sec  
RG 32.25  
DW 60.800 usec  
DE 6.50 usec  
TE 295.1 K  
D1 1.00000000 sec  
TD0 1

===== CHANNEL f1 =====  
NUC1 1H  
P1 14.75 usec  
PLW1 11.99499989 W  
SFO1 400.1524711 MHz

F2 - Processing parameters  
SI 16384  
SF 400.1500000 MHz  
WDW EM  
SSB 0  
LB 0.30 Hz  
GB 0  
PC 1.00

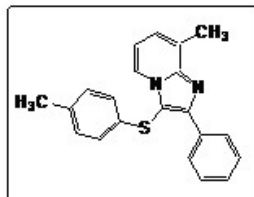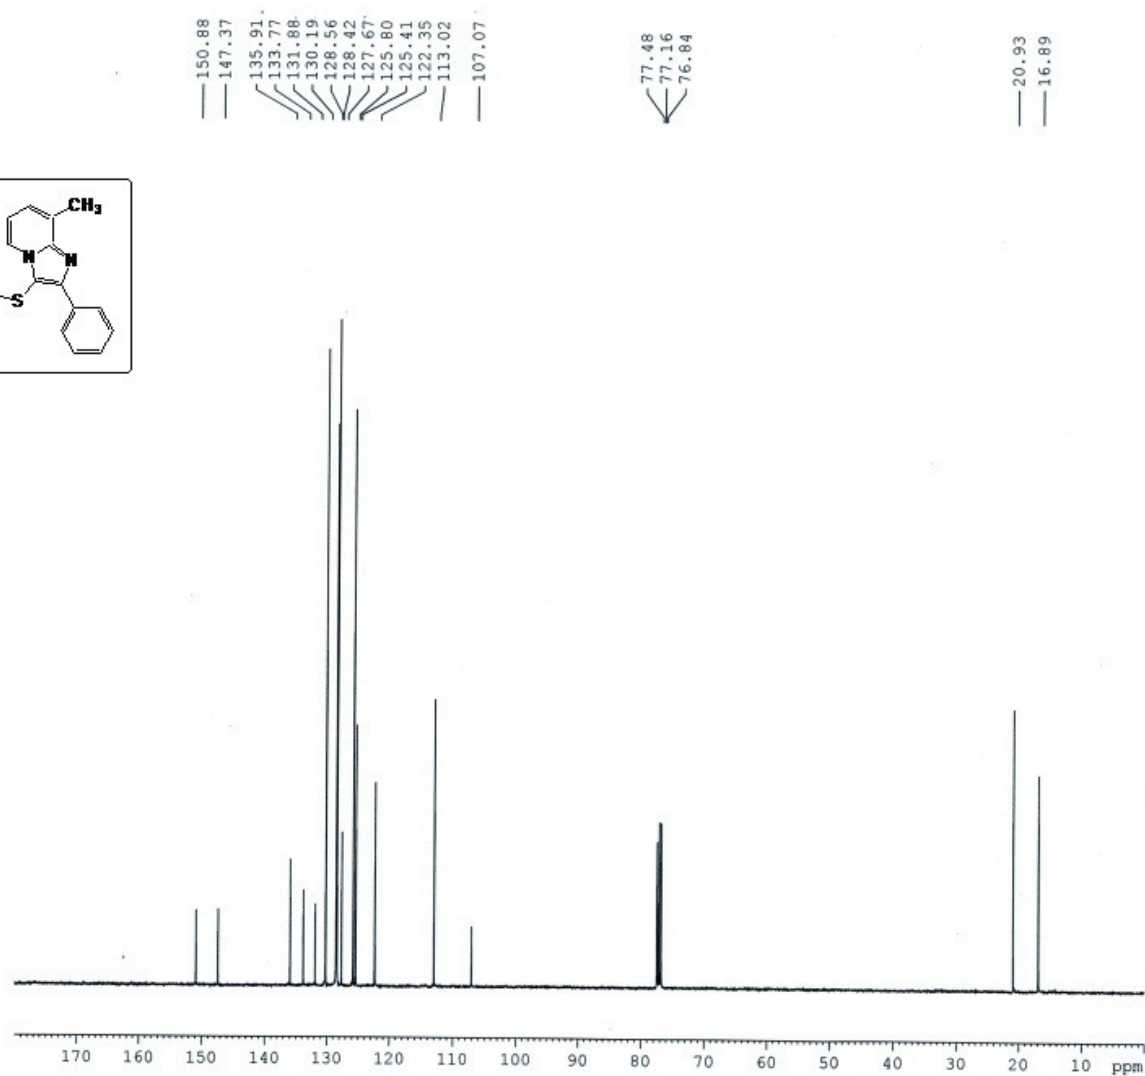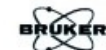

Current Data Parameters  
NAME Dr. A HAJRA 2014  
EXPNO 662  
PROCNO 1

F2 - Acquisition Parameters  
Date\_ 20140801  
Time 10.50  
INSTRUM spect  
PROBHD 5 mm PABBO BB/  
PULPROG zgpg30  
TD 32768  
SOLVENT CDCl3  
NS 512  
DS 2  
SWH 24038.461 Hz  
FIDRES 0.733596 Hz  
AQ 0.6816244 sec  
RG 32.25  
DW 20.800 usec  
DE 6.50 usec  
TE 296.2 K  
D1 2.00000000 sec  
D11 0.03000000 sec  
TD0 1

===== CHANNEL f1 =====  
NUC1 13C  
P1 8.90 usec  
PLW1 54.00000000 W  
SFO1 100.6278588 MHz

===== CHANNEL f2 =====  
CPDPRG2 waltz16  
NUC2 1H  
PCPD2 80.00 usec  
PLW2 12.00000000 W  
PLW12 0.40792999 W  
PLW13 0.26107001 W  
SFO2 400.1516006 MHz

F2 - Processing parameters  
SI 16384  
SF 100.6177968 MHz  
WDW EM  
SSB 0  
LB 1.00 Hz  
GB 0  
PC 1.40

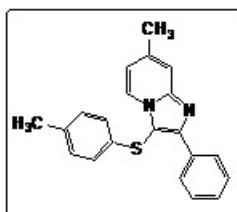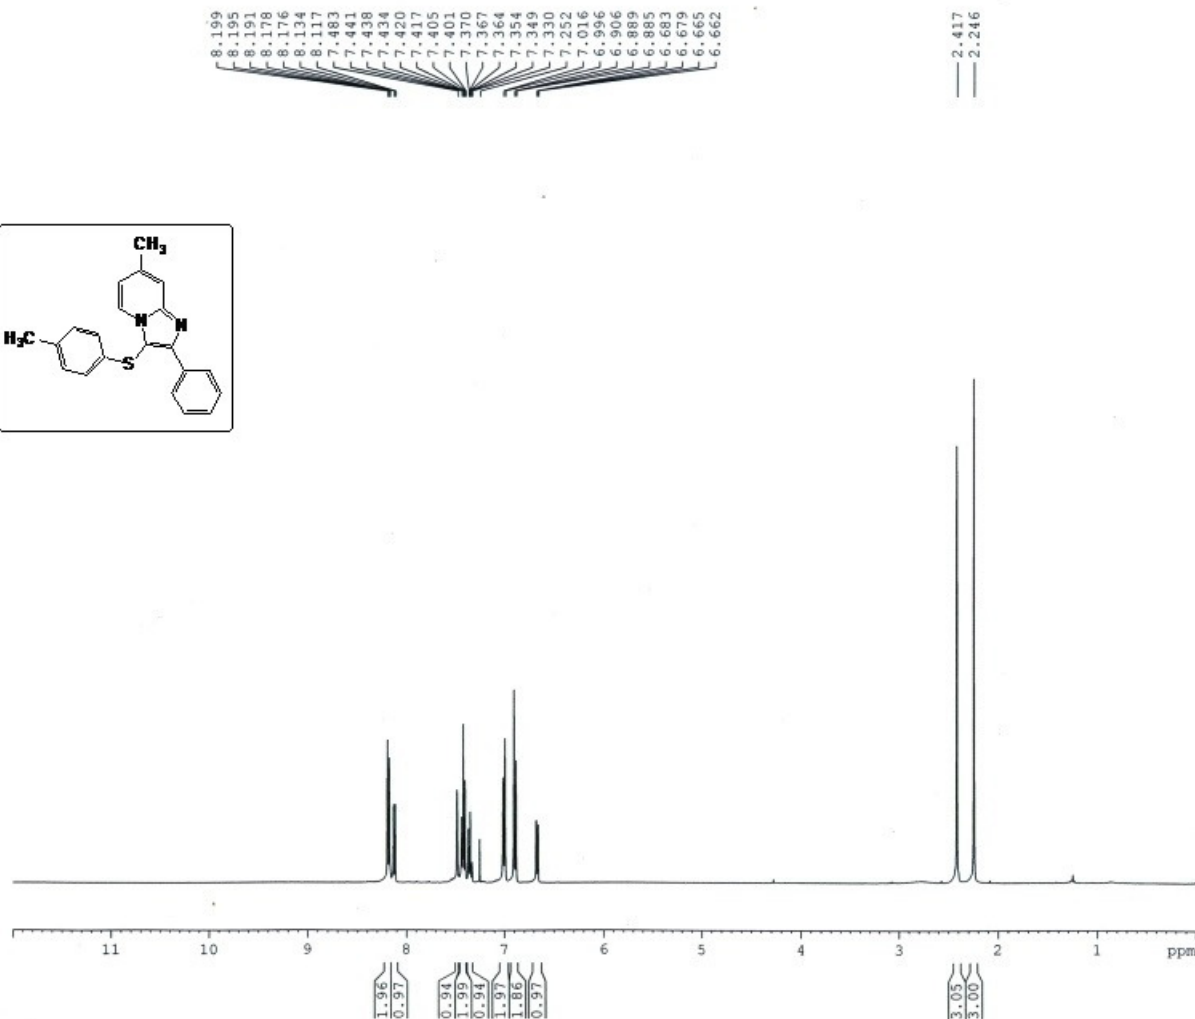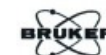

Current Data Parameters  
 NAME Dr. A HAJRA 2014  
 EXPNO 774  
 PROCNO 1

F2 - Acquisition Parameters  
 Date\_ 20140823  
 Time 19.40  
 INSTRUM spect  
 PROBHD 5 mm PABBO BB/  
 PULPROG zg30  
 TD 32768  
 SOLVENT CDCl3  
 NS 16  
 DS 2  
 SWH 8223.685 Hz  
 FIDRES 0.250967 Hz  
 AQ 1.9923444 sec  
 RG 87.66  
 DW 60.800 usec  
 DE 6.50 usec  
 TE 296.8 K  
 DL 1.00000000 sec  
 TD0 1

===== CHANNEL f1 =====  
 NUC1 1H  
 P1 14.75 usec  
 PLW1 11.99499989 W  
 SFO1 400.1524711 MHz

F2 - Processing parameters  
 SI 16384  
 SF 400.1500121 MHz  
 WDW EM  
 SSB 0  
 LB 0.30 Hz  
 GB 0  
 PC 1.00

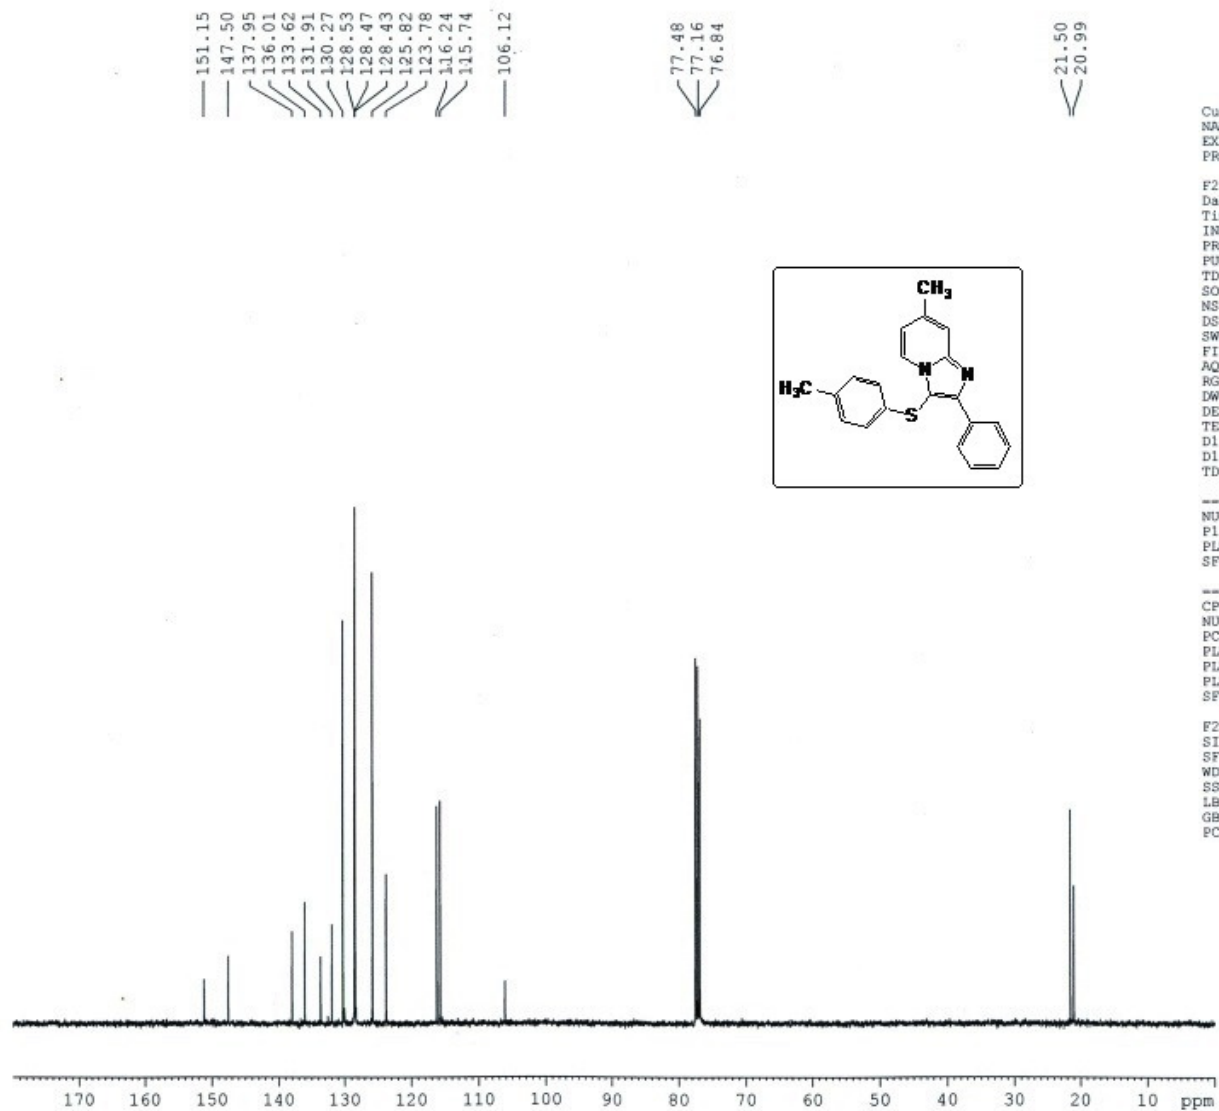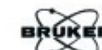

Current Data Parameters  
NAME Dr. A HAJRA 2014  
EXPNO 785  
PROCNO 1

F2 - Acquisition Parameters  
Date 20140825  
Time 20.14  
INSTRUM spect  
PROBHD 5 mm PABBO BB/  
PULPROG zgpg30  
TD 32768  
SOLVENT CDC13  
NS 400  
DS 2  
SWH 24038.461 Hz  
FIDRES 0.733596 Hz  
AQ 0.6816244 sec  
RG 87.66  
DW 20.800 usec  
DE 6.50 usec  
TE 297.6 K  
D1 2.00000000 sec  
D11 0.03000000 sec  
TD0 1

----- CHANNEL f1 -----  
NUC1 13C  
P1 8.90 usec  
PLW1 54.00000000 W  
SFO1 100.6278588 MHz

----- CHANNEL f2 -----  
CPDPRG2 waltz16  
NUC2 1H  
PCPD2 80.00 usec  
PLW2 12.00000000 W  
PLW12 0.40792999 W  
PLW13 0.26107001 W  
SFO2 400.1516006 MHz

F2 - Processing parameters  
SI 16384  
SF 100.6177880 MHz  
WDM EM  
SSB 0  
LB 1.00 Hz  
GB 0  
PC 1.40

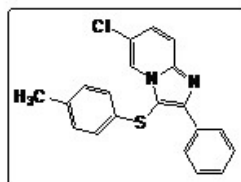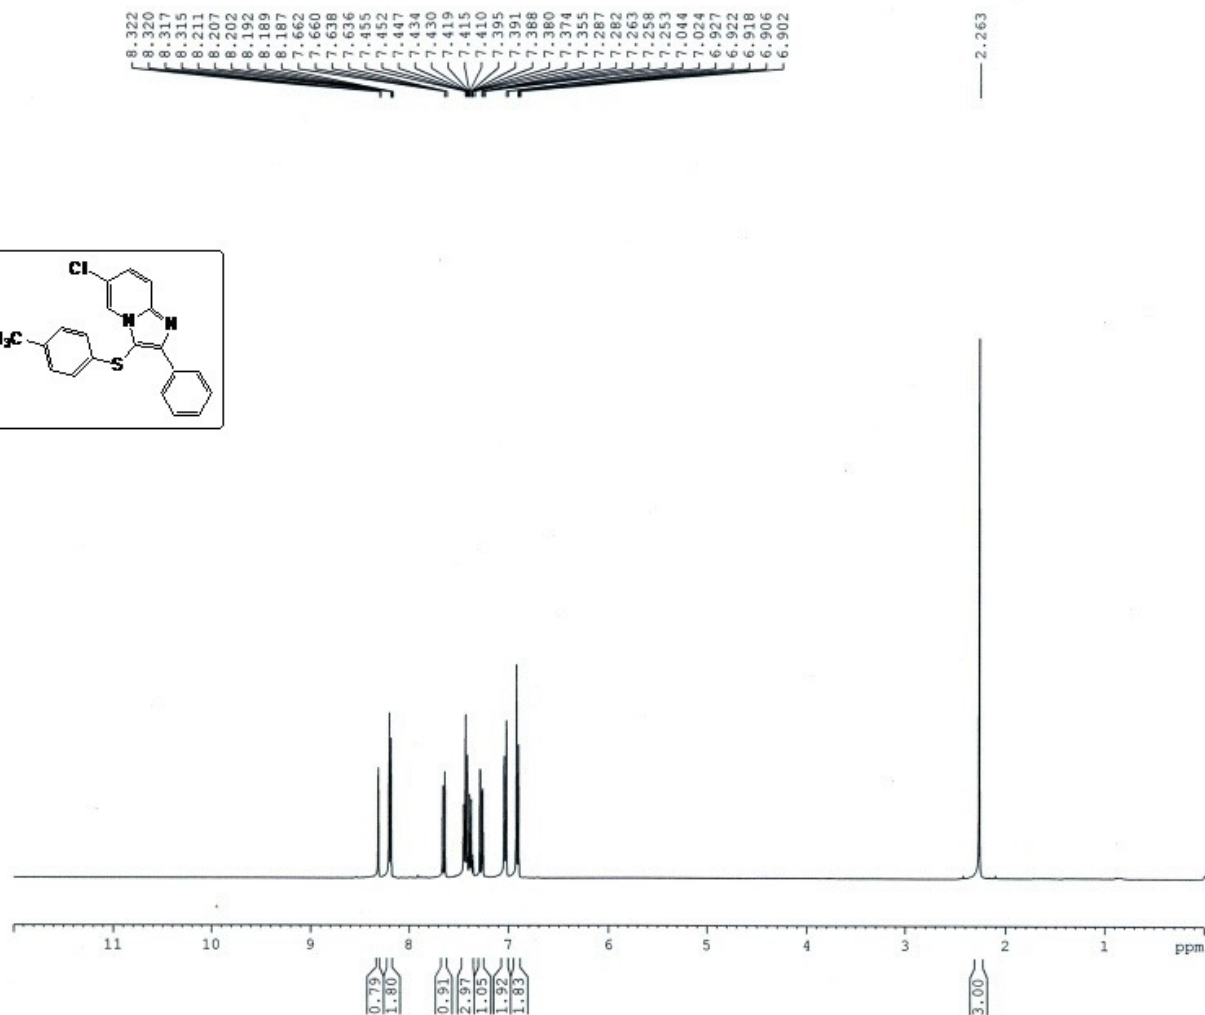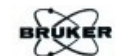

Current Data Parameters  
NAME Dr. A HAJRA 2014  
EXPNO 773  
PROCNO 1

F2 - Acquisition Parameters  
Date\_ 20140823  
Time 19.34  
INSTRUM spect  
PROBHD 5 mm PABBO BB/  
PULPROG zg30  
TD 32768  
SOLVENT CDCl3  
NS 16  
DS 2  
SWH 8223.685 Hz  
FIDRES 0.250967 Hz  
AQ 1.9923444 sec  
RG 87.66  
DW 60.800 usec  
DE 6.50 usec  
TE 296.8 K  
D1 1.00000000 sec  
TD0 1

----- CHANNEL f1 -----  
NUC1 1H  
P1 14.75 usec  
PLW1 11.99499989 W  
SFO1 400.1524711 MHz

F2 - Processing parameters  
SI 16384  
SF 400.1500116 MHz  
WDW EM  
SSB 0  
LB 0.30 Hz  
GB 0  
PC 1.00

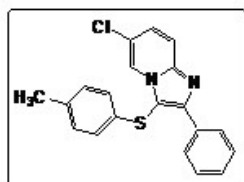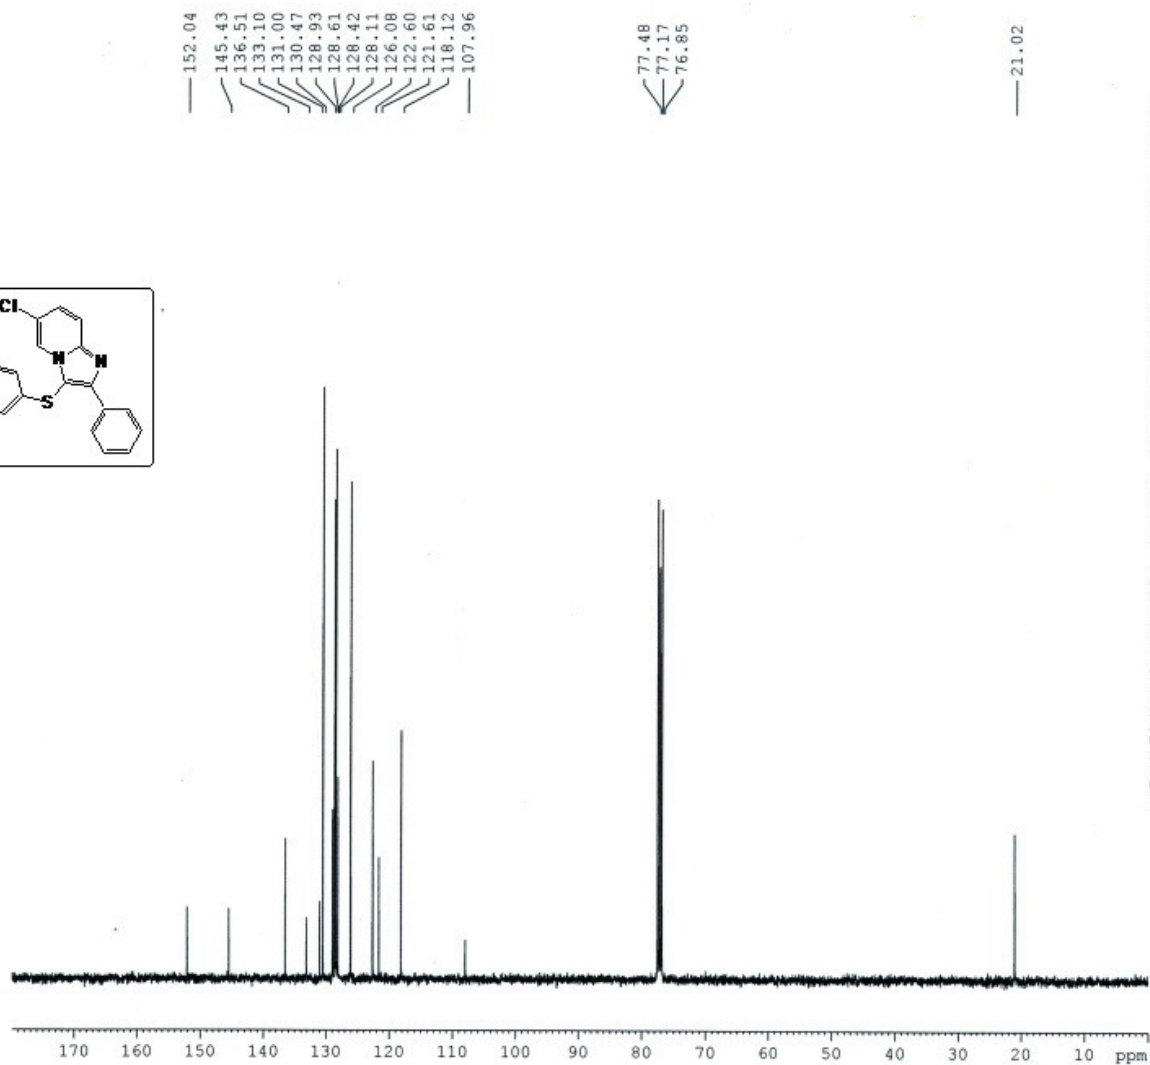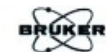

Current Data Parameters  
NAME Dr. A HAJRA, 2014  
EXTNO 784  
PROCNO 1

F2 - Acquisition Parameters  
Date 20140825  
Time 19.52  
INSTRUM spect  
PROBHD 5 mm PABBO BB/  
PULPROG zgpg30  
TD 32768  
SOLVENT CDCl3  
NS 320  
DS 2  
SWH 24038.461 Hz  
FIDRES 0.733596 Hz  
AQ 0.6816244 sec  
RG 87.66  
DW 20.800 usec  
DE 6.50 usec  
TE 297.5 K  
D1 2.00000000 sec  
D11 0.03000000 sec  
TD0 1

===== CHANNEL f1 =====  
NUC1 13C  
P1 8.90 usec  
PLW1 54.00000000 W  
SFO1 100.6278588 MHz

===== CHANNEL f2 =====  
CPDPRG2 waltz16  
NUC2 1H  
PCPD2 80.00 usec  
PLW2 12.00000000 W  
PLW12 0.40792999 W  
PLW13 0.26107001 W  
SFO2 400.1516006 MHz

F2 - Processing parameters  
SI 16384  
SF 100.6177866 MHz  
WDW EM  
SSB 0  
LB 1.00 Hz  
GB 0  
PC 1.40

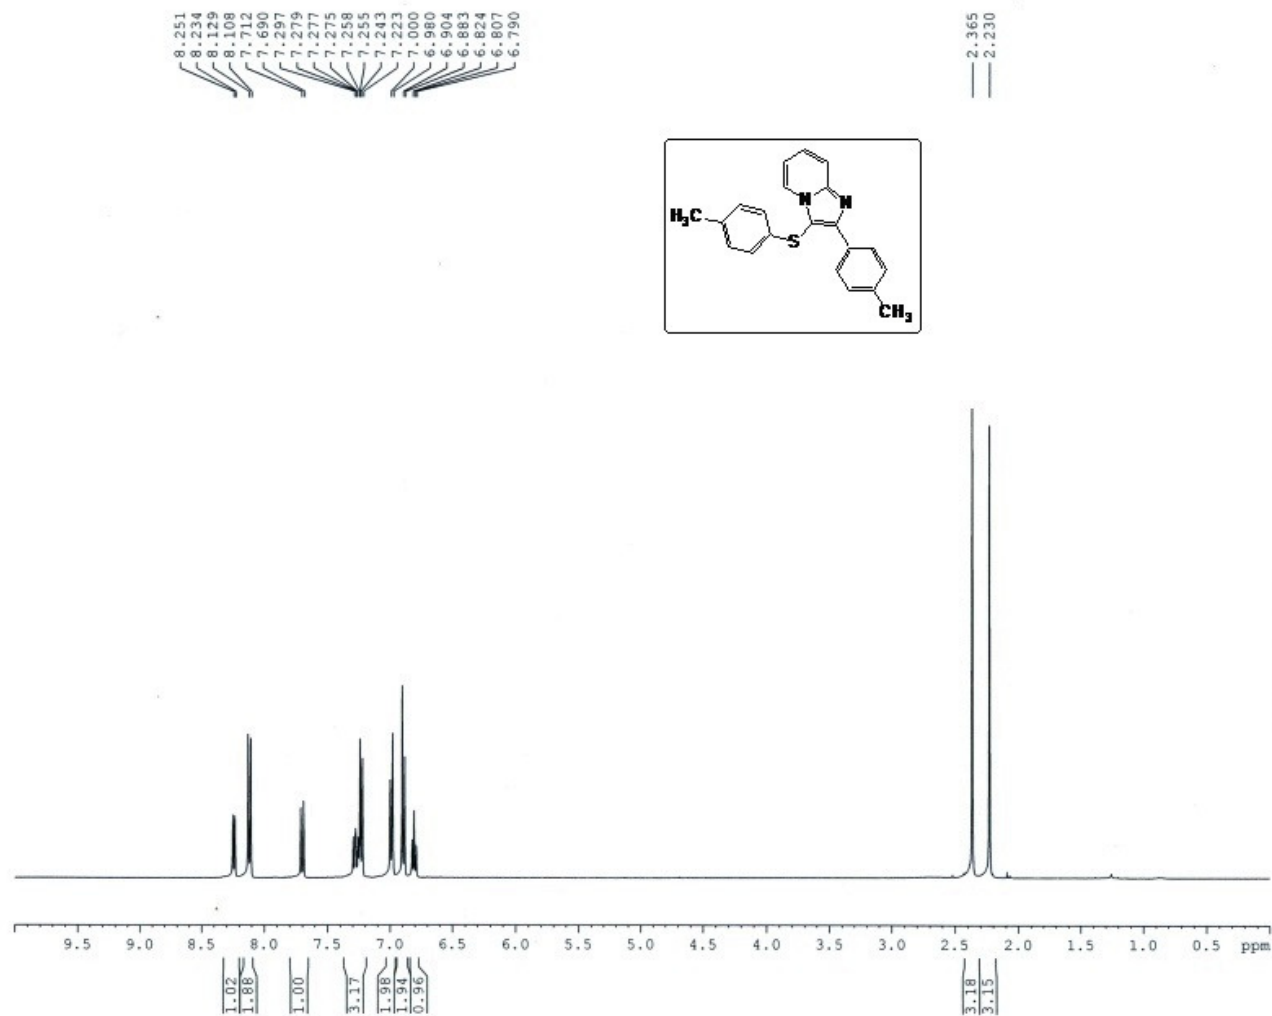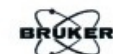

Current Data Parameters  
 NAME Dr. A HAJRA 2014  
 EXPNO 872  
 PROCNO 1

F2 - Acquisition Parameters  
 Date\_ 20140909  
 Time\_ 11.46  
 INSTRUM spect  
 PROBHD 5 mm PABBO BB/  
 PULPROG zg30  
 TD 32768  
 SOLVENT CDCl3  
 NS 24  
 DS 2  
 SWH 8223.685 Hz  
 FIDRES 0.250967 Hz  
 AQ 1.9923444 sec  
 RG 47.25  
 DW 60.800 usec  
 DE 6.50 usec  
 TE 300.9 K  
 D1 1.00000000 sec  
 TDO 1

----- CHANNEL f1 -----  
 NUC1 1H  
 P1 14.75 usec  
 PLW1 11.99499989 W  
 SFO1 400.1524711 MHz

F2 - Processing parameters  
 SI 16384  
 SF 400.1500157 MHz  
 WDW EM  
 SSB 0  
 LB 0.30 Hz  
 GB 0  
 PC 1.00

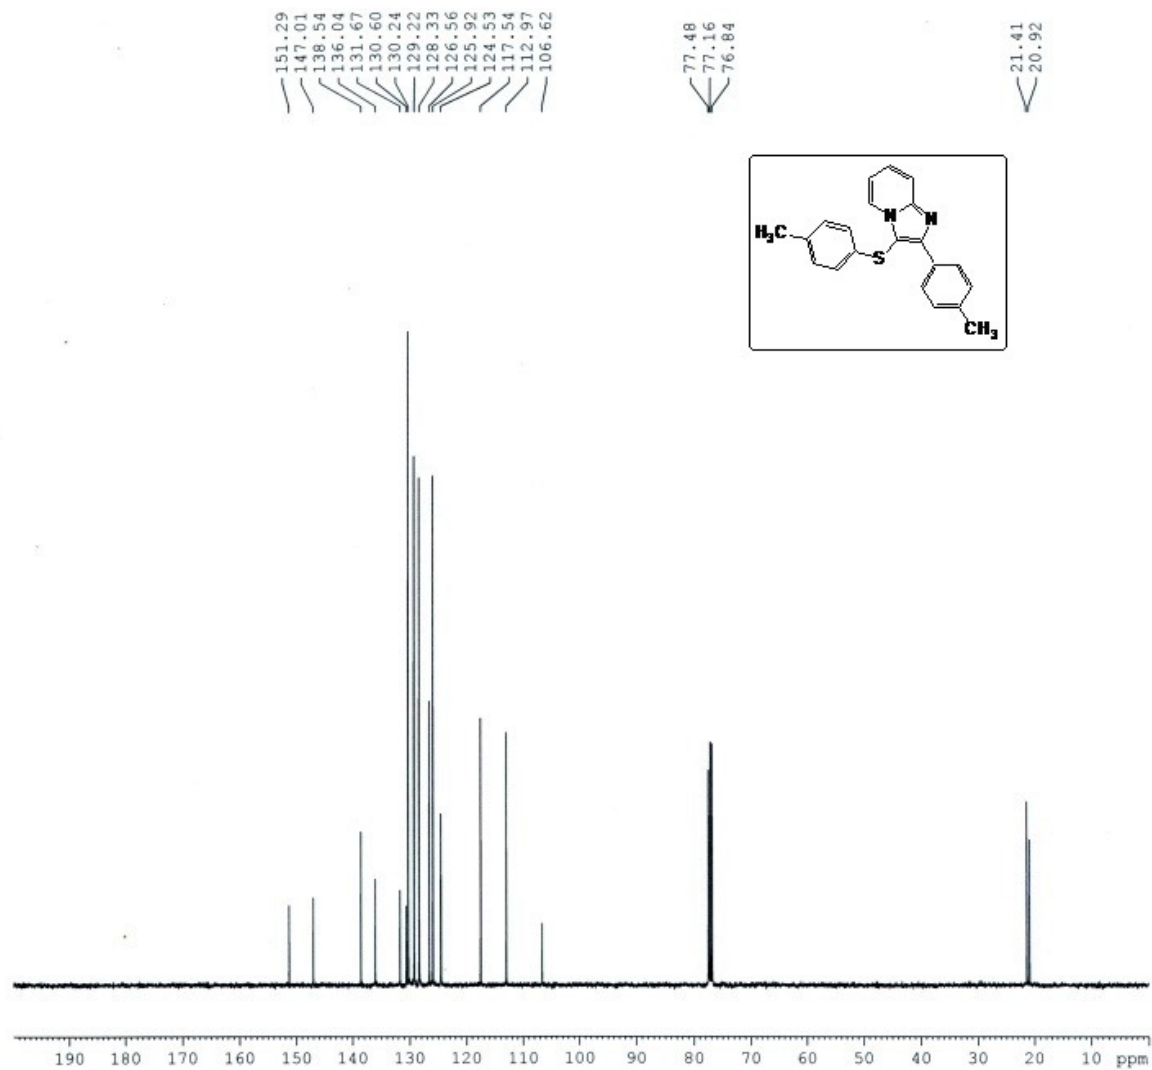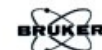

Current Data Parameters  
NAME Dr. A HAJRA 2014  
EXFNO 927  
PROCNO 1

F2 - Acquisition Parameters  
Date 20140919  
Time 10.41  
INSTRUM spect  
PROBHD 5 mm PABBO BB/  
PULPROG zgpg30  
TD 32768  
SOLVENT CDCl3  
NS 320  
DS 2  
SWH 24038.461 Hz  
FIDRES 0.733596 Hz  
AQ 0.6816244 sec  
RG 87.66  
DW 20.800 usec  
DE 6.50 usec  
TE 303.0 K  
D1 2.00000000 sec  
D11 0.03000000 sec  
TDO 1

===== CHANNEL f1 =====  
NUC1 13C  
P1 8.90 usec  
PLW1 54.00000000 W  
SFO1 100.6278588 MHz

===== CHANNEL f2 =====  
CPDPRG2 waltz16  
NUC2 1H  
PCPD2 80.00 usec  
PLW2 12.00000000 W  
PLW12 0.40792999 W  
PLW13 0.26107001 W  
SFO2 400.1516006 MHz

F2 - Processing parameters  
SI 16384  
SF 100.6177924 MHz  
WDW EM  
SSB 0  
LB 1.00 Hz  
GB 0  
PC 1.40

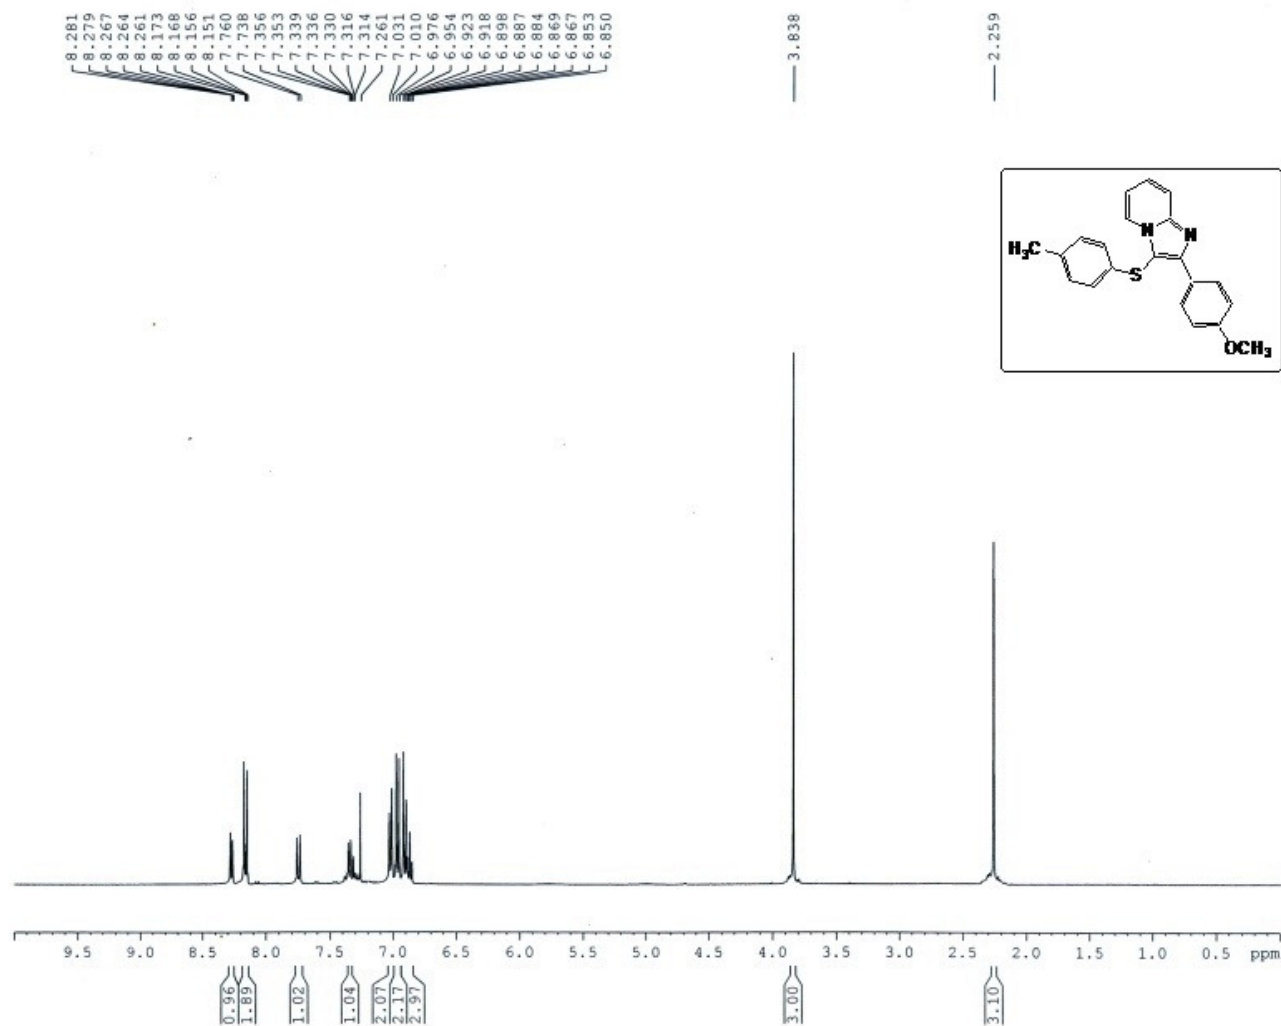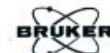

Current Data Parameters  
NAME Dr. A HAJRA 2014  
EXPNO 943  
PROCNO 1

F2 - Acquisition Parameters  
Date\_ 20140927  
Time 20.16  
INSTRUM spect  
PROBHD 5 mm PABBO BB/  
PULPROG zg30  
TD 32768  
SOLVENT CDCl3  
NS 32  
DS 2  
SWH 8223.685 Hz  
FIDRES 0.250967 Hz  
AQ 1.9923444 sec  
RG 87.66  
DW 60.800 usec  
DE 6.50 usec  
TE 298.0 K  
D1 1.00000000 sec  
TD0 1

===== CHANNEL f1 =====  
NUC1 1H  
P1 14.75 usec  
PLW1 11.99499989 W  
SFO1 400.1524711 MHz

F2 - Processing parameters  
SI 16384  
SF 400.1500086 MHz  
WDW EM  
SSB 0  
LB 0.30 Hz  
GB 0  
PC 1.00

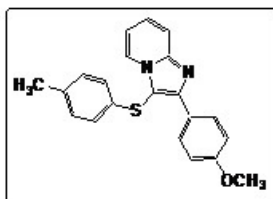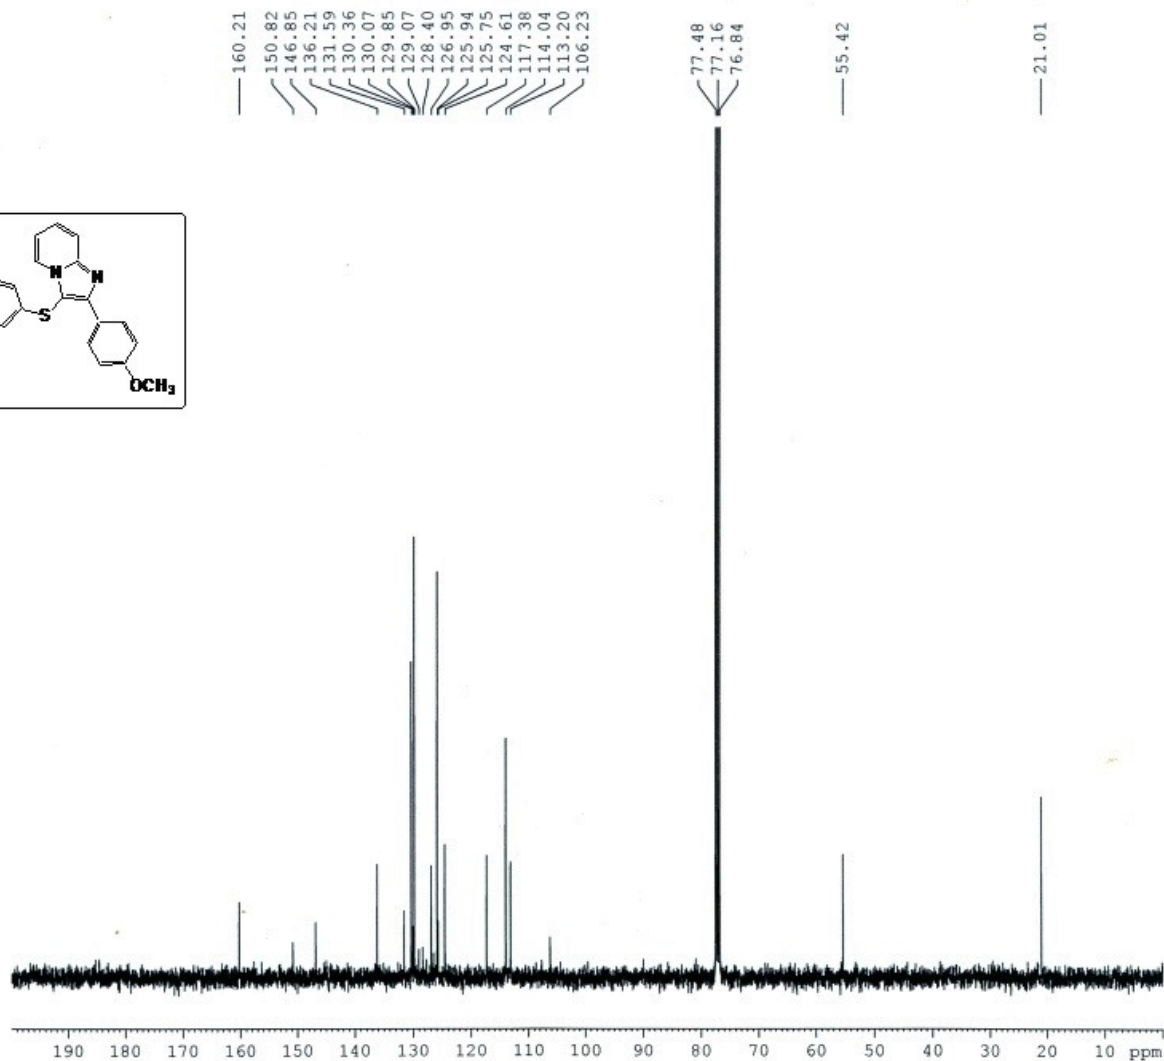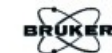

Current Data Parameters  
 NAME Dr. A HAJRA 2014  
 EXPNO 980  
 PROCNO 1

F2 - Acquisition Parameters  
 Date\_ 20141015  
 Time\_ 20.08  
 INSTRUM spect  
 PROBHD 5 mm PABBO BB/  
 PULPROG zgpg30  
 TD 32768  
 SOLVENT CDCl<sub>3</sub>  
 NS 400  
 DS 2  
 SWH 24038.461 Hz  
 FIDRES 0.733596 Hz  
 AQ 0.6816244 sec  
 RG 87.66  
 DW 20.800 usec  
 DE 6.50 usec  
 TE 299.1 K  
 D1 2.00000000 sec  
 D11 0.03000000 sec  
 TD0 1

===== CHANNEL f1 =====  
 NUC1 13C  
 P1 8.90 usec  
 PLW1 54.00000000 W  
 SFO1 100.6278588 MHz

===== CHANNEL f2 =====  
 CPDPRG2 waltz16  
 NUC2 1H  
 PCPD2 80.00 usec  
 PLW2 12.00000000 W  
 PLW12 0.40792999 W  
 PLW13 0.26107001 W  
 SFO2 400.1516006 MHz

F2 - Processing parameters  
 SI 16384  
 SF 100.6177844 MHz  
 WDW EM  
 SSB 0  
 LB 1.00 Hz  
 GB 0  
 PC 1.40

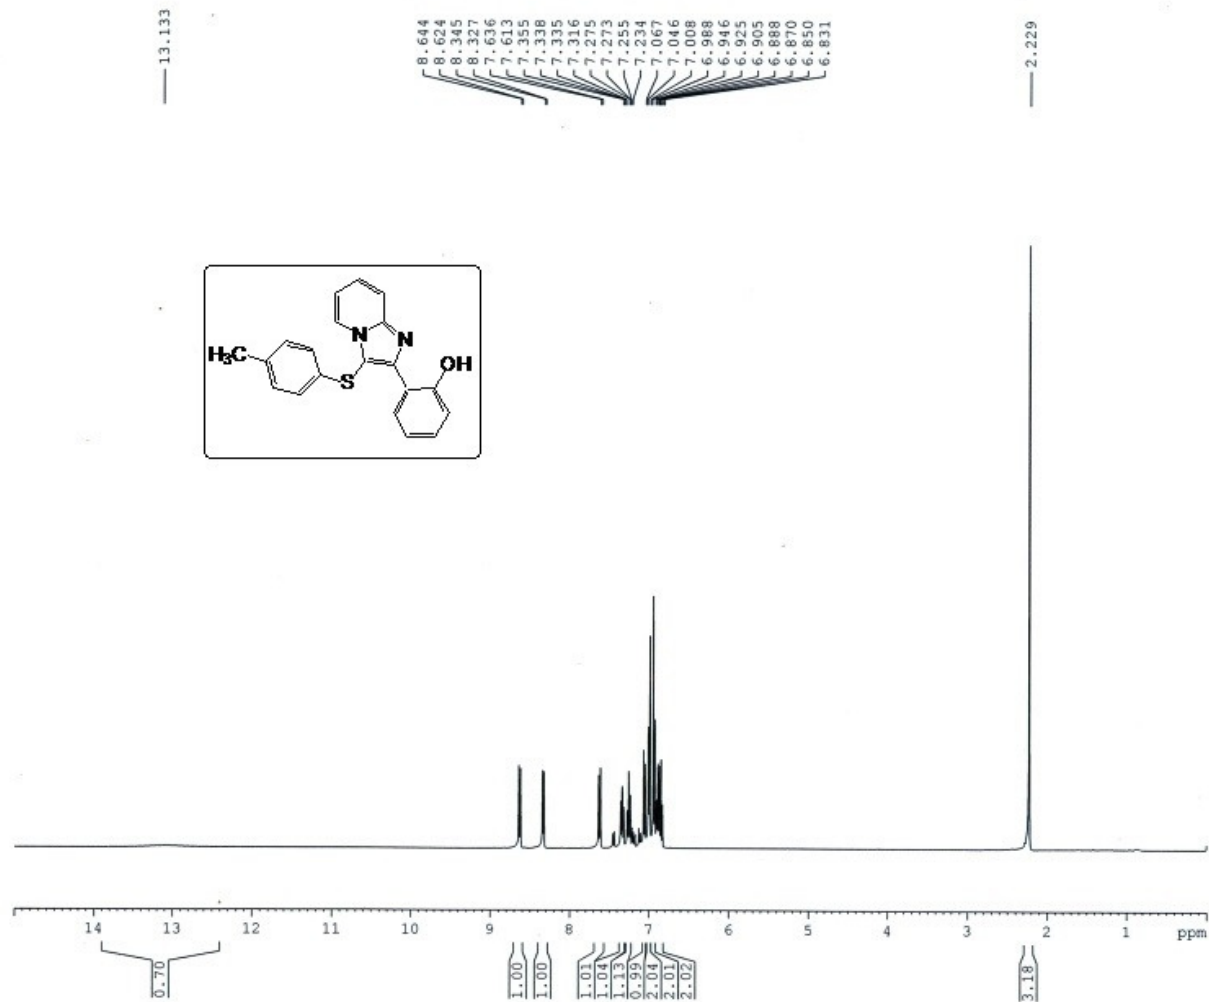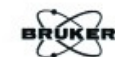

Current Data Parameters  
 NAME Dr. A HAJRA 2014  
 EXPNO 832  
 PROCNO 1

F2 - Acquisition Parameters  
 Date\_ 20140904  
 Time 20.53  
 INSTRUM spect  
 PROBHD 5 mm PABBO BB/  
 PULPROG zg30  
 TD 32768  
 SOLVENT CDCl3  
 NS 24  
 DS 2  
 SWH 8223.685 Hz  
 FIDRES 0.250967 Hz  
 AQ 1.9923444 sec  
 RG 40.87  
 DW 60.800 usec  
 DE 6.50 usec  
 TE 296.0 K  
 D1 1.00000000 sec  
 TDO 1

----- CHANNEL f1 -----  
 NUC1 1H  
 P1 14.75 usec  
 PLW1 11.99499989 W  
 SFO1 400.1524711 MHz

F2 - Processing parameters  
 SI 16384  
 SF 400.1500213 MHz  
 WDW EM  
 SSB 0  
 LB 0.30 Hz  
 GB 0  
 PC 1.00

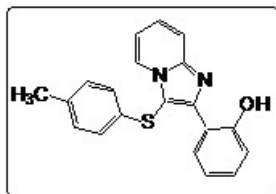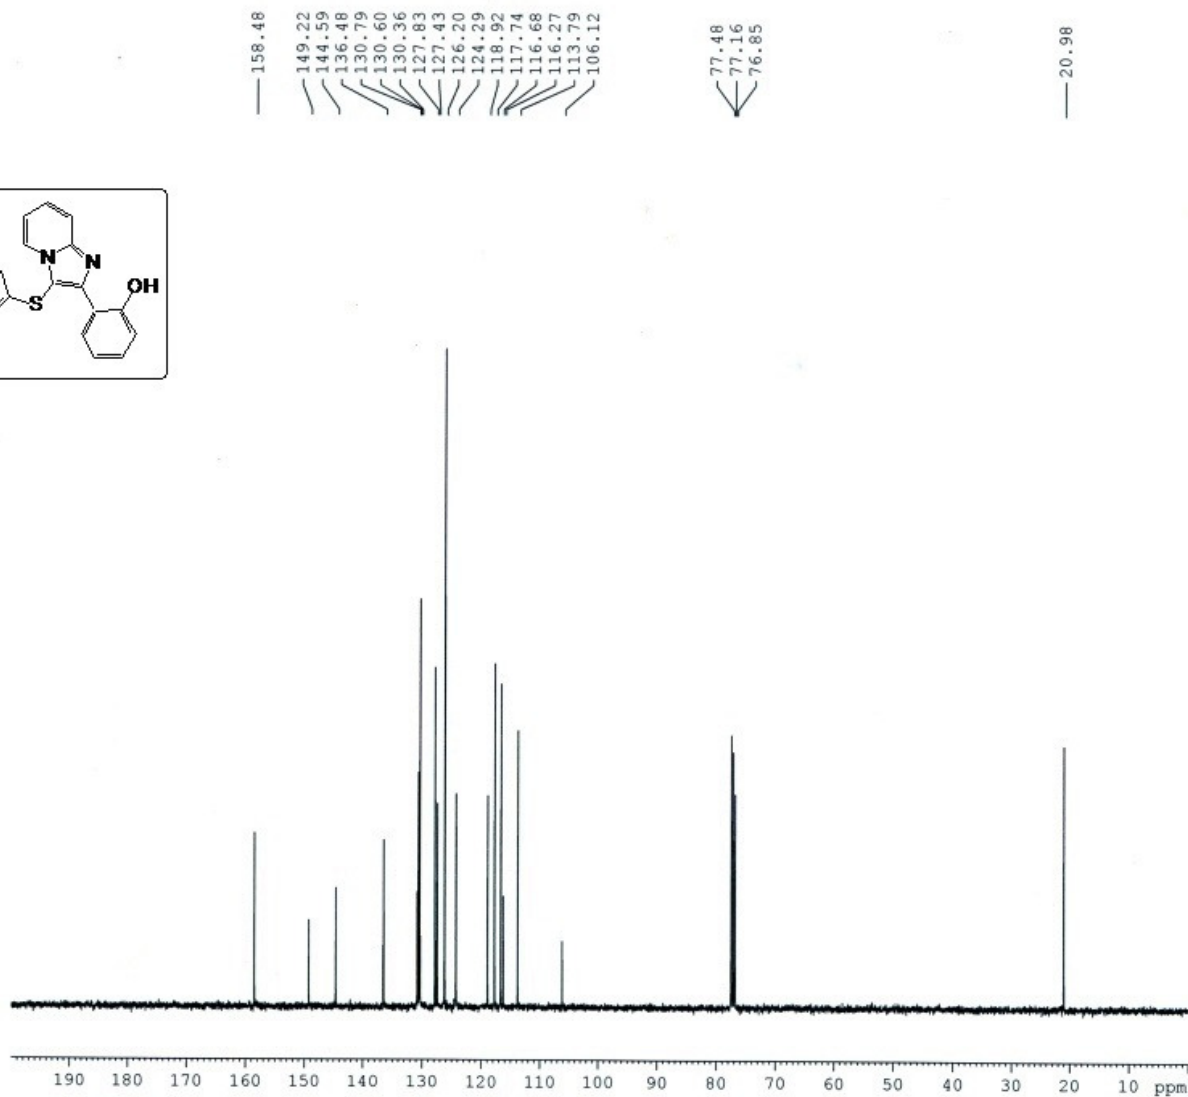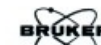

Current Data Parameters  
NAME Dr. A HAJRA 2014  
EXFNO 851  
PROCNO 1

F2 - Acquisition Parameters  
Date\_ 20140907  
Time\_ 9.34  
INSTRUM spect  
PROBHD 5 mm PABBO BB/  
PULPROG zgpg30  
TD 32768  
SOLVENT CDCl3  
NS 160  
DS 2  
SWH 24038.461 Hz  
FIDRES 0.733596 Hz  
AQ 0.6816244 sec  
RG 40.87  
CW 20.800 usec  
DE 6.50 usec  
TE 296.1 K  
D1 2.00000000 sec  
D11 0.03000000 sec  
TDO 1

----- CHANNEL f1 -----  
NUC1 13C  
P1 8.90 usec  
PLW1 54.00000000 W  
SFO1 100.6278588 MHz

----- CHANNEL f2 -----  
CPDPRG2 waltz16  
NUC2 1H  
PCPD2 80.00 usec  
PLW2 12.00000000 W  
PLW12 0.40792999 W  
PLW13 0.26107001 W  
SFO2 400.1516006 MHz

F2 - Processing parameters  
SI 16384  
SF 100.6177939 MHz  
WDM EM  
SSB 0  
LB 1.00 Hz  
GB 0  
PC 1.40

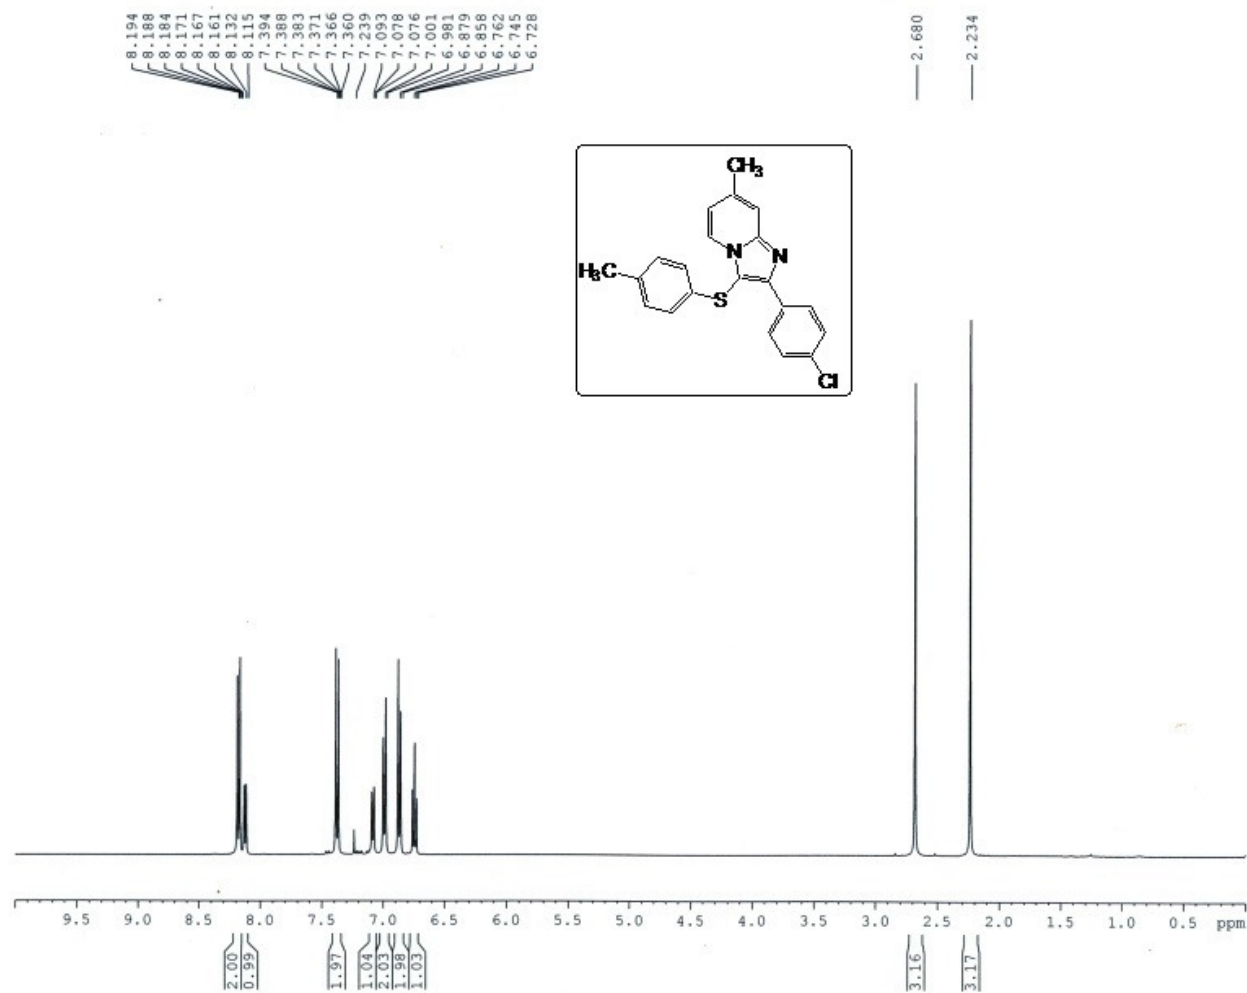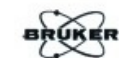

Current Data Parameters  
 NAME Dr. A HAJRA 2014  
 EXPNO 874  
 PROCNO 1

F2 - Acquisition Parameters  
 Date\_ 20140909  
 Time 11.58  
 INSTRUM spect  
 PROBHD 5 mm PABBO BB/  
 PULPROG zg30  
 TD 32768  
 SOLVENT CDCl<sub>3</sub>  
 NS 24  
 DS 2  
 SWH 8223.685 Hz  
 FIDRES 0.250967 Hz  
 AQ 1.9923444 sec  
 RG 54.07  
 DW 60.800 usec  
 DE 6.50 usec  
 TE 300.6 K  
 D1 1.00000000 sec  
 TD0 1

===== CHANNEL f1 =====  
 NUC1 <sup>1</sup>H  
 P1 14.75 usec  
 PLW1 11.99499989 W  
 SFO1 400.1524711 MHz

F2 - Processing parameters  
 SI 16384  
 SF 400.1500171 MHz  
 WDW EM  
 SSB 0  
 LB 0.30 Hz  
 GB 0  
 PC 1.00

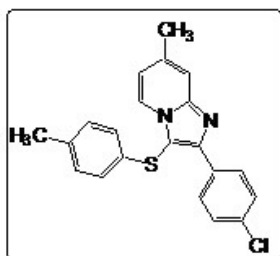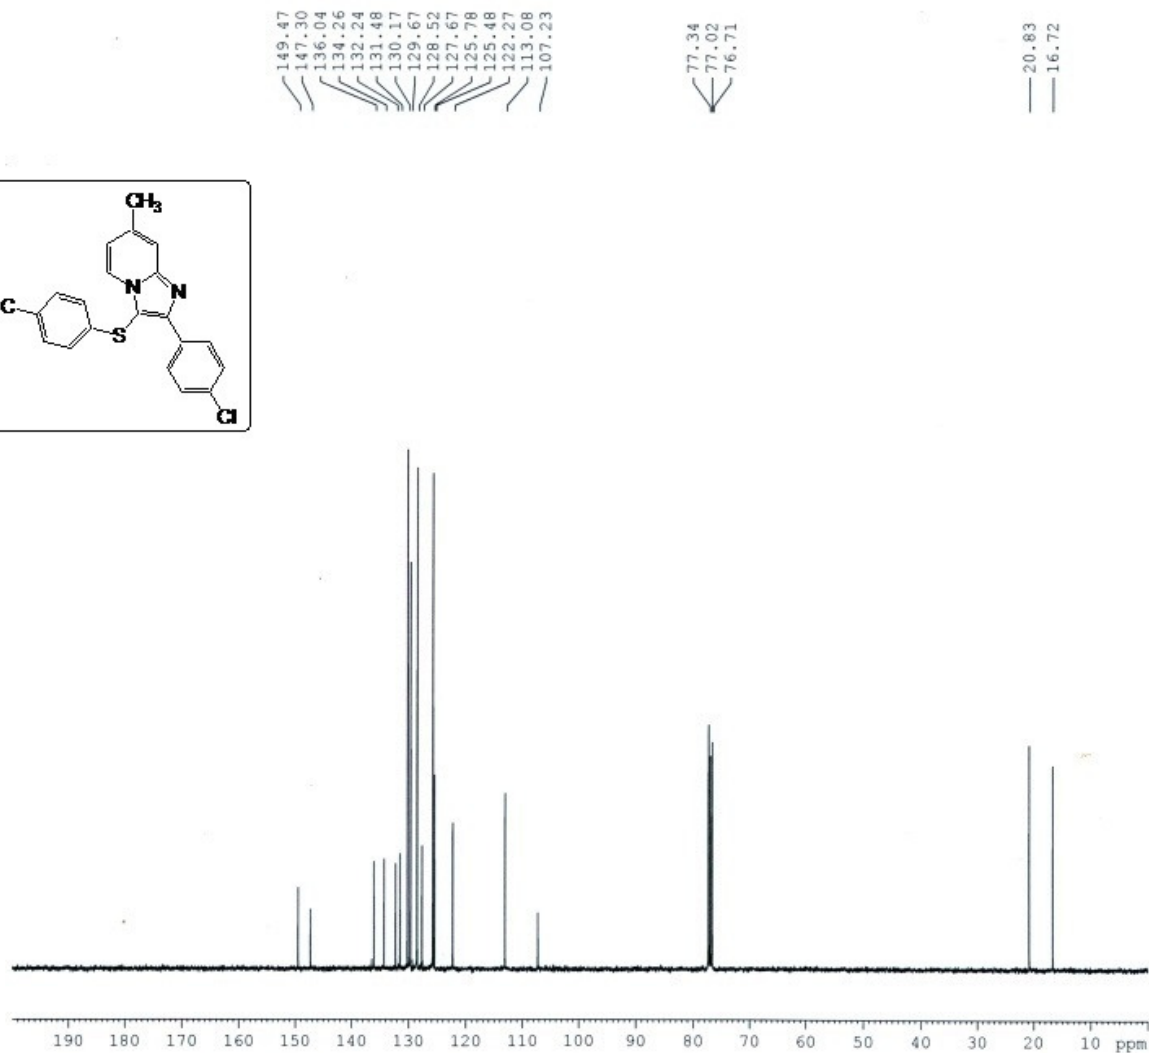

**BRUKER**

Current Data Parameters  
NAME Dr. A HAJRA 2014  
EXPNO 875  
PROCNO 1

F2 - Acquisition Parameters  
Date\_ 20140909  
Time 12.17  
INSTRUM spect  
PROBHD 5 mm PABBO BB/  
PULPROG zgpg30  
TD 32768  
SOLVENT CDCl3  
NS 320  
DS 2  
SWH 24038.461 Hz  
FIDRES 0.733596 Hz  
AQ 0.6816244 sec  
RG 47.25  
DW 20.800 usec  
DE 6.50 usec  
TE 301.3 K  
D1 2.00000000 sec  
D11 0.03000000 sec  
TD0 1

----- CHANNEL f1 -----  
NUC1 13C  
P1 8.90 usec  
PLW1 54.00000000 W  
SFO1 100.6278588 MHz

----- CHANNEL f2 -----  
CPDPRG2 waltz16  
NUC2 1H  
PCPD2 80.00 usec  
PLW2 12.00000000 W  
PLW12 0.40792999 W  
PLW13 0.26107001 W  
SFO2 400.1516006 MHz

F2 - Processing parameters  
SI 16384  
SF 100.6178026 MHz  
WDW EM  
SSB 0  
LB 1.00 Hz  
GB 0  
PC 1.40

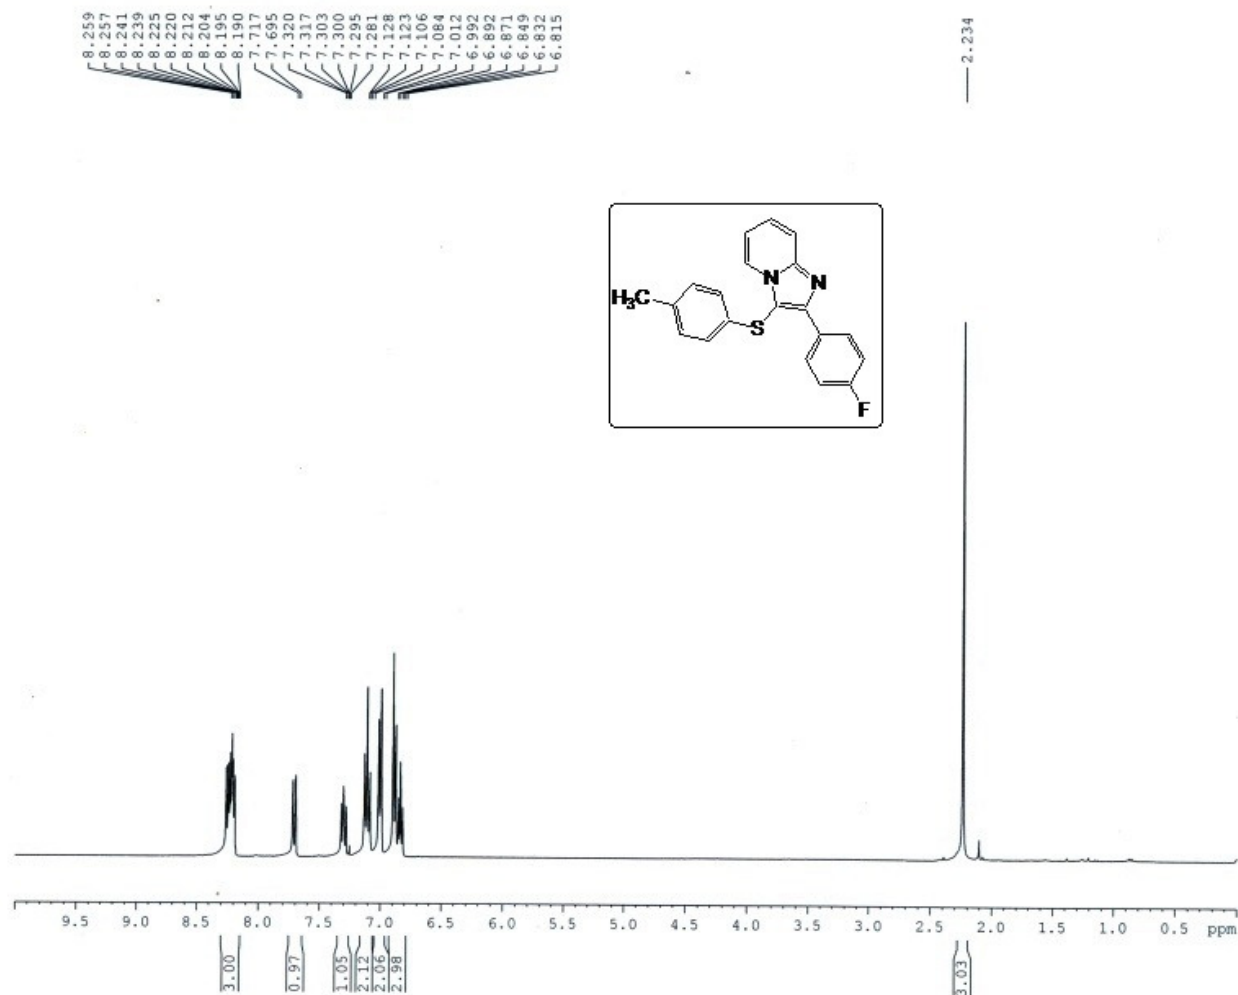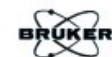

Current Data Parameters  
 NAME Dr. A HAJRA 2014  
 EXPNO 949  
 PROCNO 1

F2 - Acquisition Parameters  
 Date\_ 20141010  
 Time 20.44  
 INSTRUM spect  
 PROBHD 5 mm PABBO BB/  
 PULPROG zg30  
 TD 32768  
 SOLVENT CDCl3  
 NS 24  
 DS 2  
 SWH 8223.685 KHz  
 FIDRES 0.250967 KHz  
 AQ 1.9923444 sec  
 RG 32.25  
 DW 60.800 usec  
 DE 6.50 usec  
 TE 296.1 K  
 D1 1.00000000 sec  
 TDO 1

===== CHANNEL f1 =====  
 NUC1 1H  
 P1 14.75 usec  
 PLW1 11.99499989 W  
 SFO1 400.1524711 MHz

F2 - Processing parameters  
 SI 16384  
 SF 400.1500112 MHz  
 WDW EM  
 SSB 0  
 LB 0.30 Hz  
 GB 0  
 PC 1.00

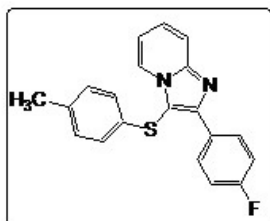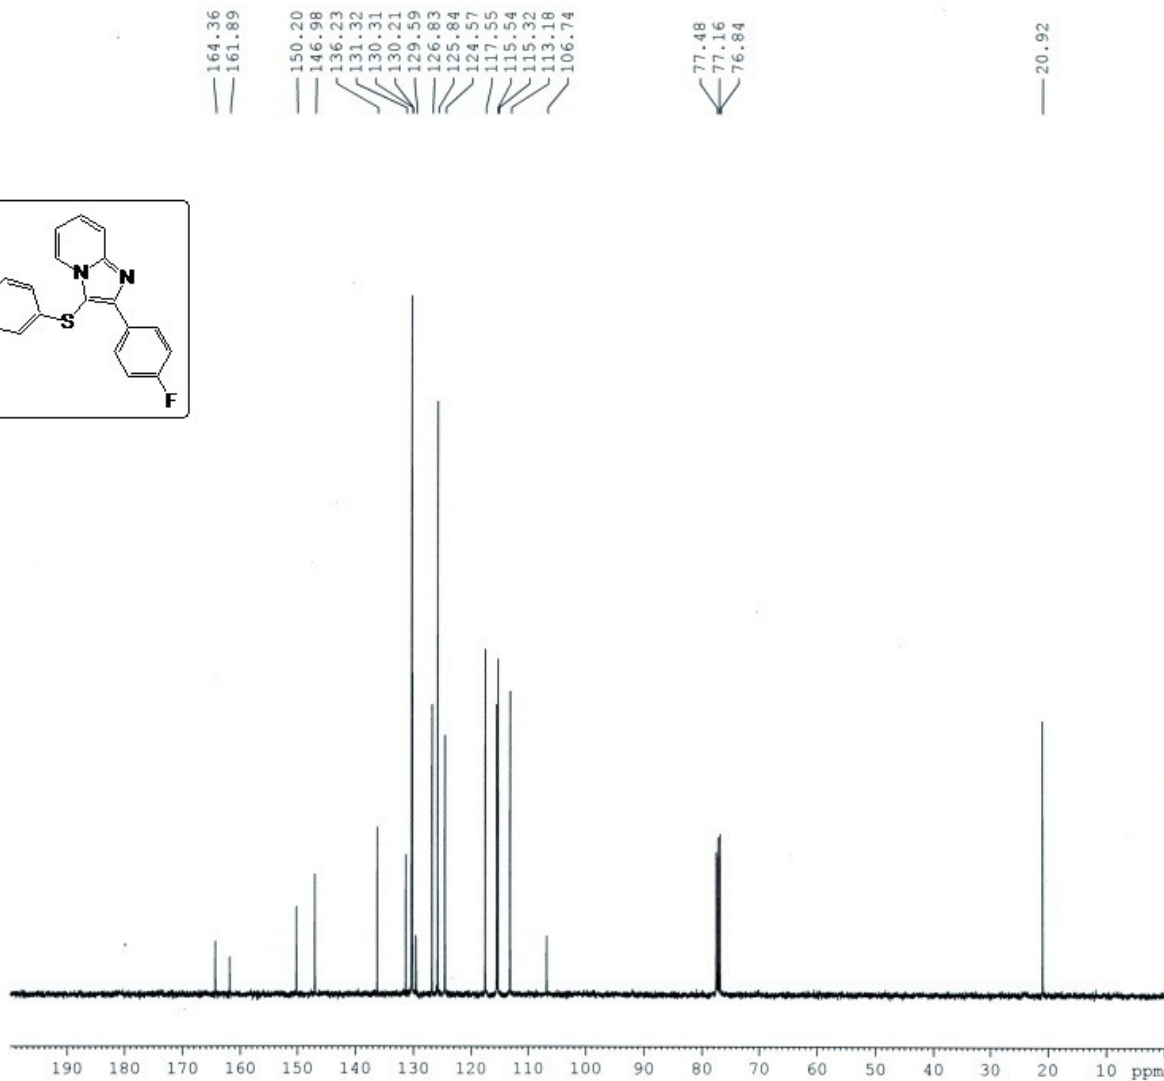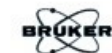

Current Data Parameters  
 NAME Dr. A HAJRA 2014  
 EXPNO 954  
 PROCNO 1

F2 - Acquisition Parameters  
 Date\_ 20141011  
 Time 12.14  
 INSTRUM spect  
 PROBHD 5 mm PABBO BB/  
 PULPROG zgpg30  
 TD 32768  
 SOLVENT CDC13  
 NS 220  
 DS 2  
 SWH 24038.461 Hz  
 FIDRES 0.733596 Hz  
 AQ 0.6816244 sec  
 RG 32.25  
 DW 20.800 usec  
 DE 6.50 usec  
 TE 298.9 K  
 D1 2.00000000 sec  
 D11 0.03000000 sec  
 TD0 1

===== CHANNEL f1 =====  
 NUC1 13C  
 P1 8.90 usec  
 PLW1 54.00000000 W  
 SFO1 100.6278588 MHz

===== CHANNEL f2 =====  
 CPDPRG2 waltz16  
 NUC2 1H  
 PCPD2 80.00 usec  
 PLW2 12.00000000 W  
 PLW12 0.40792999 W  
 PLW13 0.26107001 W  
 SFO2 400.1516006 MHz

F2 - Processing parameters  
 SI 16384  
 SF 100.6177939 MHz  
 WDM EM  
 SSB 0  
 LB 1.00 Hz  
 GB 0  
 PC 1.40

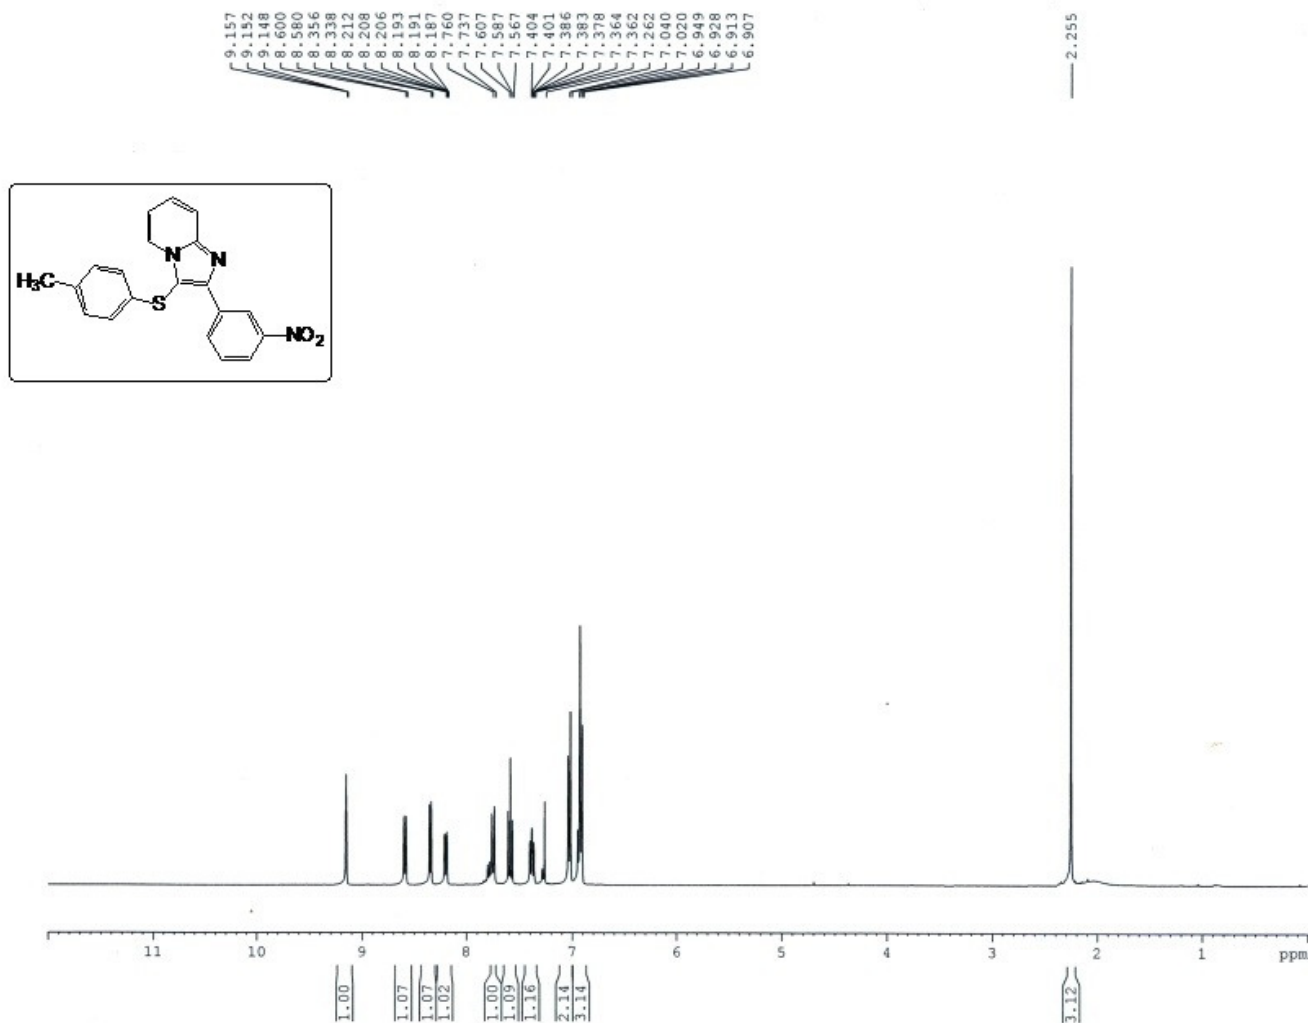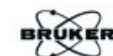

Current Data Parameters  
 NAME Dr. A HAJRA 2014  
 EXPNO 873  
 PROCNO 1

F2 - Acquisition Parameters  
 Date\_ 20140909  
 Time 11.52  
 INSTRUM spect  
 PROBHD 5 mm PABBO BB/  
 PULPROG zg30  
 TD 32768  
 SOLVENT CDCl<sub>3</sub>  
 NS 24  
 DS 2  
 SWH 8223.685 Hz  
 FIDRES 0.250967 Hz  
 AQ 1.9923444 sec  
 RG 87.66  
 DW 60.800 usec  
 DE 6.50 usec  
 TE 300.8 K  
 D1 1.00000000 sec  
 TDO 1

----- CHANNEL f1 -----  
 NUC1 <sup>1</sup>H  
 P1 14.75 usec  
 PLW1 11.99499989 W  
 SFO1 400.1524711 MHz

F2 - Processing parameters  
 SI 16384  
 SF 400.1500076 MHz  
 WDW EM  
 SSB 0  
 LB 0.30 Hz  
 GB 0  
 PC 1.00

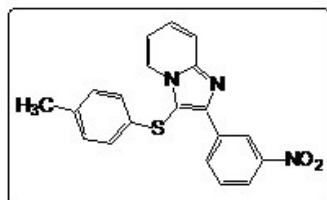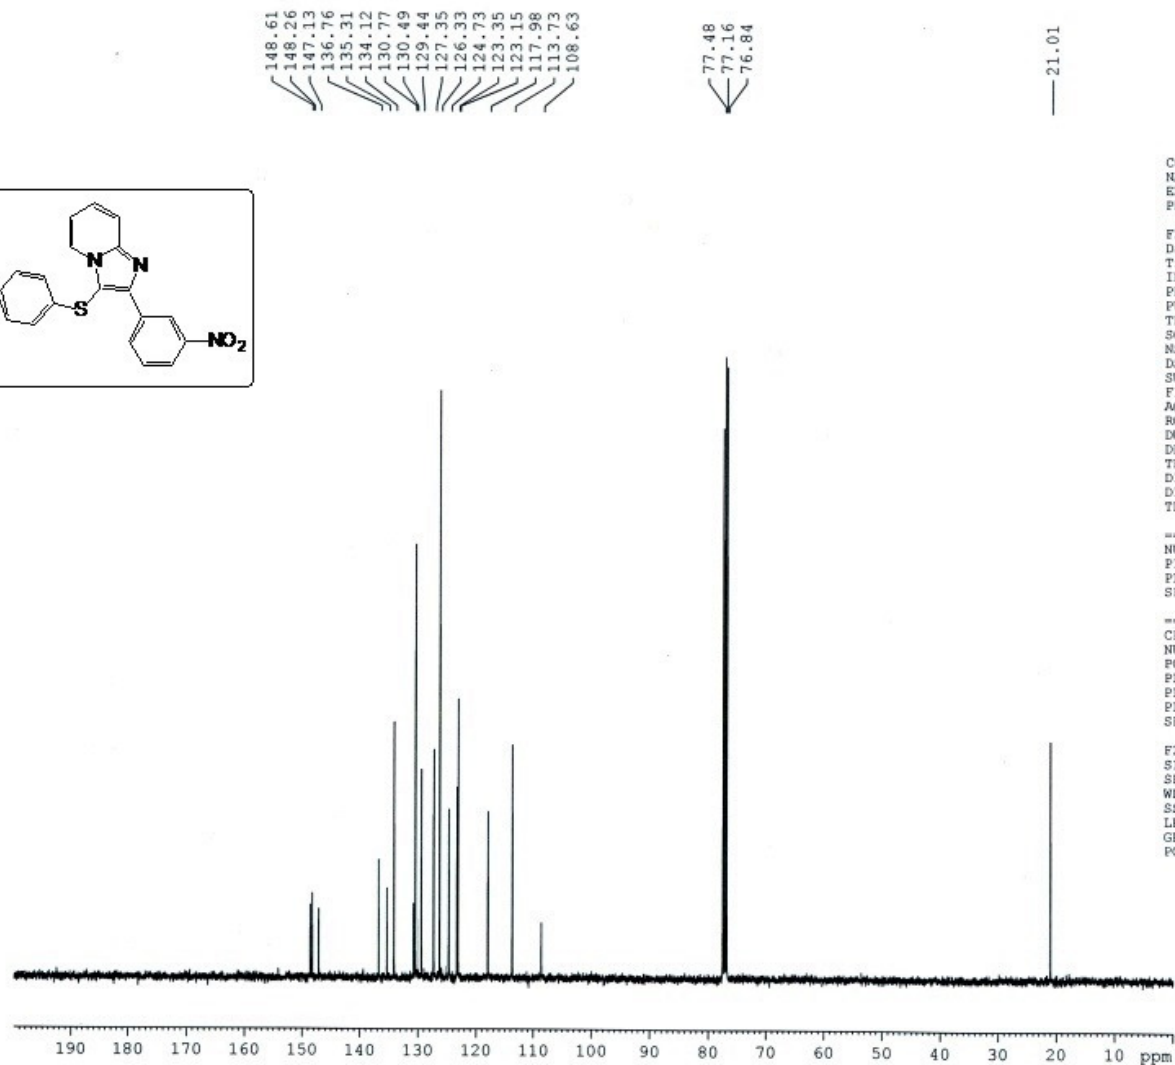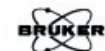

Current Data Parameters  
NAME Dr. A RAJRA 2014  
EXPNO 899  
PROCNO 1

F2 - Acquisition Parameters  
Date\_ 20140913  
Time 16.25  
INSTRUM spect  
PROBHD 5 mm PABBO BB/  
PULPROG zgpg30  
TD 32768  
SOLVENT CDCl3  
NS 512  
DS 2  
SWH 24038.461 Hz  
FIDRES 0.733596 Hz  
AQ 0.6816244 sec  
RG 87.66  
DW 20.800 usec  
DE 6.50 usec  
TE 300.7 K  
D1 2.00000000 sec  
D11 0.03000000 sec  
TD0 1

----- CHANNEL f1 -----  
NUC1 13C  
P1 8.90 usec  
PLW1 54.00000000 W  
SFO1 100.6278588 MHz

----- CHANNEL f2 -----  
CPDPRG2 waltz16  
NUC2 1H  
PCPD2 80.00 usec  
PLW2 12.00000000 W  
PLW12 0.40792999 W  
PLW13 0.26107001 W  
SFO2 400.1516006 MHz

F2 - Processing parameters  
SI 16384  
SF 100.6177865 MHz  
WDW EM  
SSB 0  
LB 1.00 Hz  
GB 0  
PC 1.40

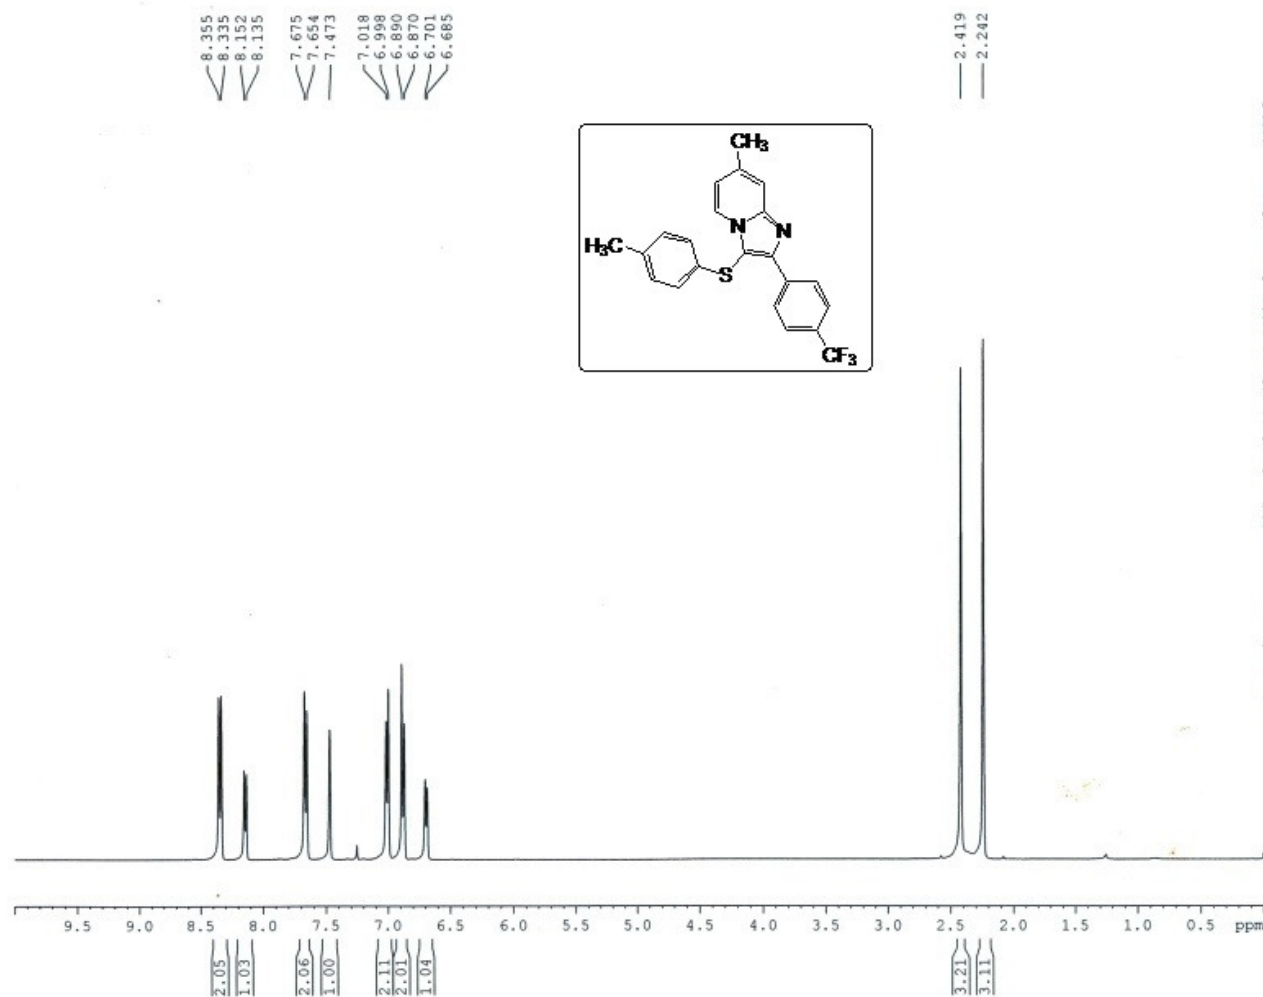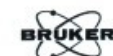

Current Data Parameters  
 NAME Dr. A HAJRA 2014  
 EXPNO 944  
 PROCNO 1

F2 - Acquisition Parameters  
 Date\_ 20140927  
 Time 20.19  
 INSTRUM spect  
 PROBHD 5 mm PABBO BB/  
 PULPROG zg30  
 TD 32768  
 SOLVENT CDCl3  
 NS 32  
 DS 2  
 SWH 8223.685 Hz  
 FIDRES 0.250967 Hz  
 AQ 1.9923444 sec  
 RG 47.25  
 DW 60.800 usec  
 DE 6.50 usec  
 TE 297.9 K  
 D1 1.00000000 sec  
 TDO 1

===== CHANNEL f1 =====  
 NUC1 1H  
 P1 14.75 usec  
 PLW1 11.99499989 W  
 SFO1 400.1524711 MHz

F2 - Processing parameters  
 SI 16384  
 SF 400.1500113 MHz  
 WDW EM  
 SSB 0  
 LB 0.30 Hz  
 GB 0  
 PC 1.00

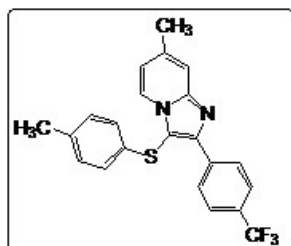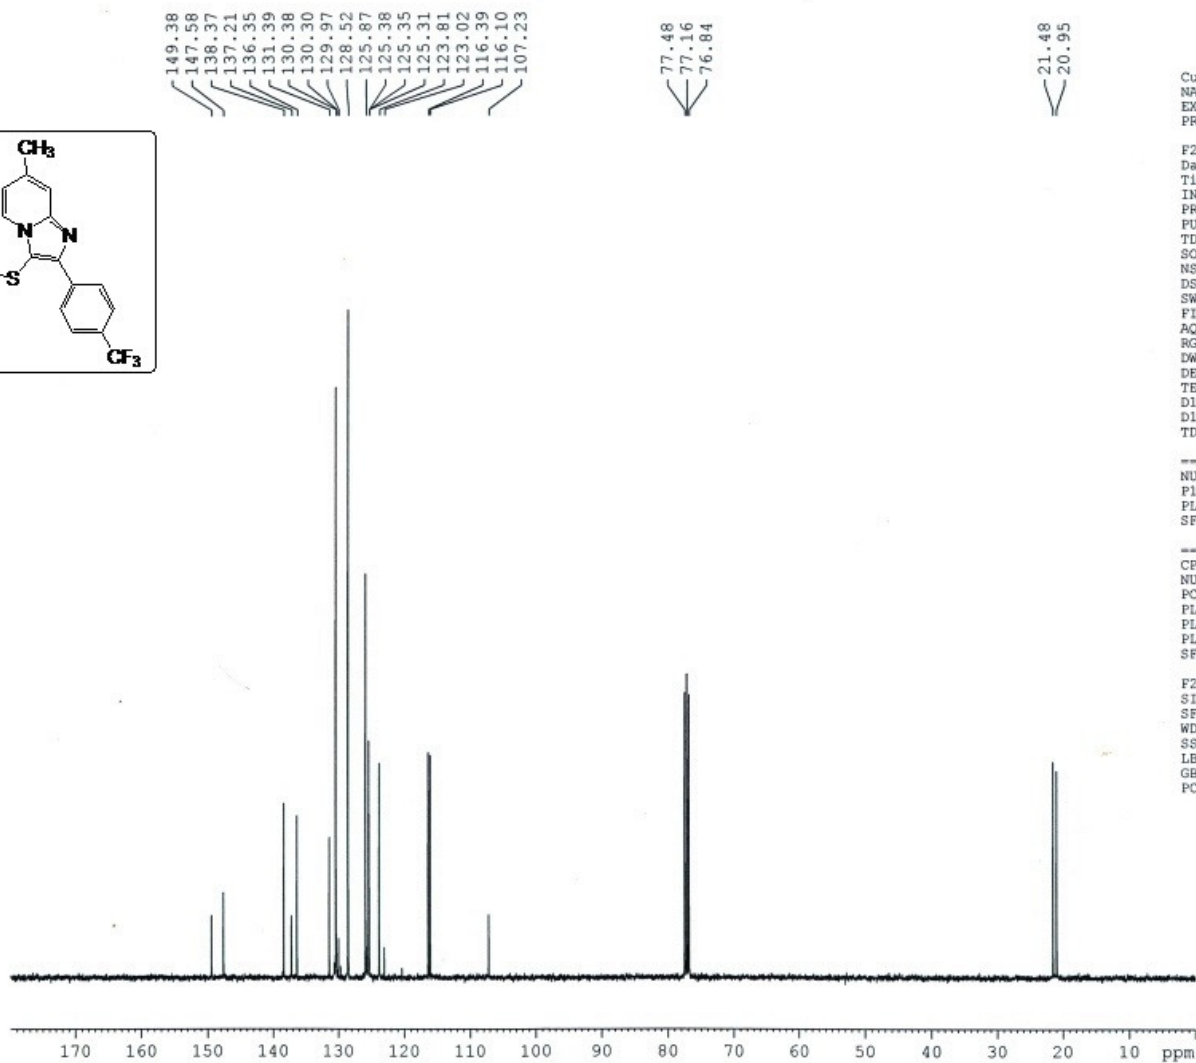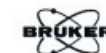

Current Data Parameters  
 NAME Dr. A HAJRA 2014  
 EXPNO 945  
 PROCNO 1

F2 - Acquisition Parameters  
 Date\_ 20140927  
 Time 20.37  
 INSTRUM spect  
 PROBHD 5 mm PABBO BB/  
 PULPROG zgpg30  
 TD 32768  
 SOLVENT CDCl3  
 NS 320  
 DS 2  
 SWH 24038.461 Hz  
 FIDRES 0.733596 Hz  
 AQ 0.6816244 sec  
 RG 47.25  
 DW 20.800 usec  
 DE 6.50 usec  
 TE 298.8 K  
 D1 2.00000000 sec  
 D11 0.03000000 sec  
 TD0 1

----- CHANNEL f1 -----  
 NUC1 13C  
 P1 8.90 usec  
 PLW1 54.00000000 W  
 SFO1 100.6278588 MHz

----- CHANNEL f2 -----  
 CPDPRG2 waltz16  
 NUC2 1H  
 PCPD2 80.00 usec  
 PLW2 12.00000000 W  
 PLW12 0.40792999 W  
 PLW13 0.26107001 W  
 SFO2 400.1516006 MHz

F2 - Processing parameters  
 SI 16384  
 SF 100.6177881 MHz  
 WDW EM  
 SSB 0  
 LB 1.00 Hz  
 GB 0  
 PC 1.40

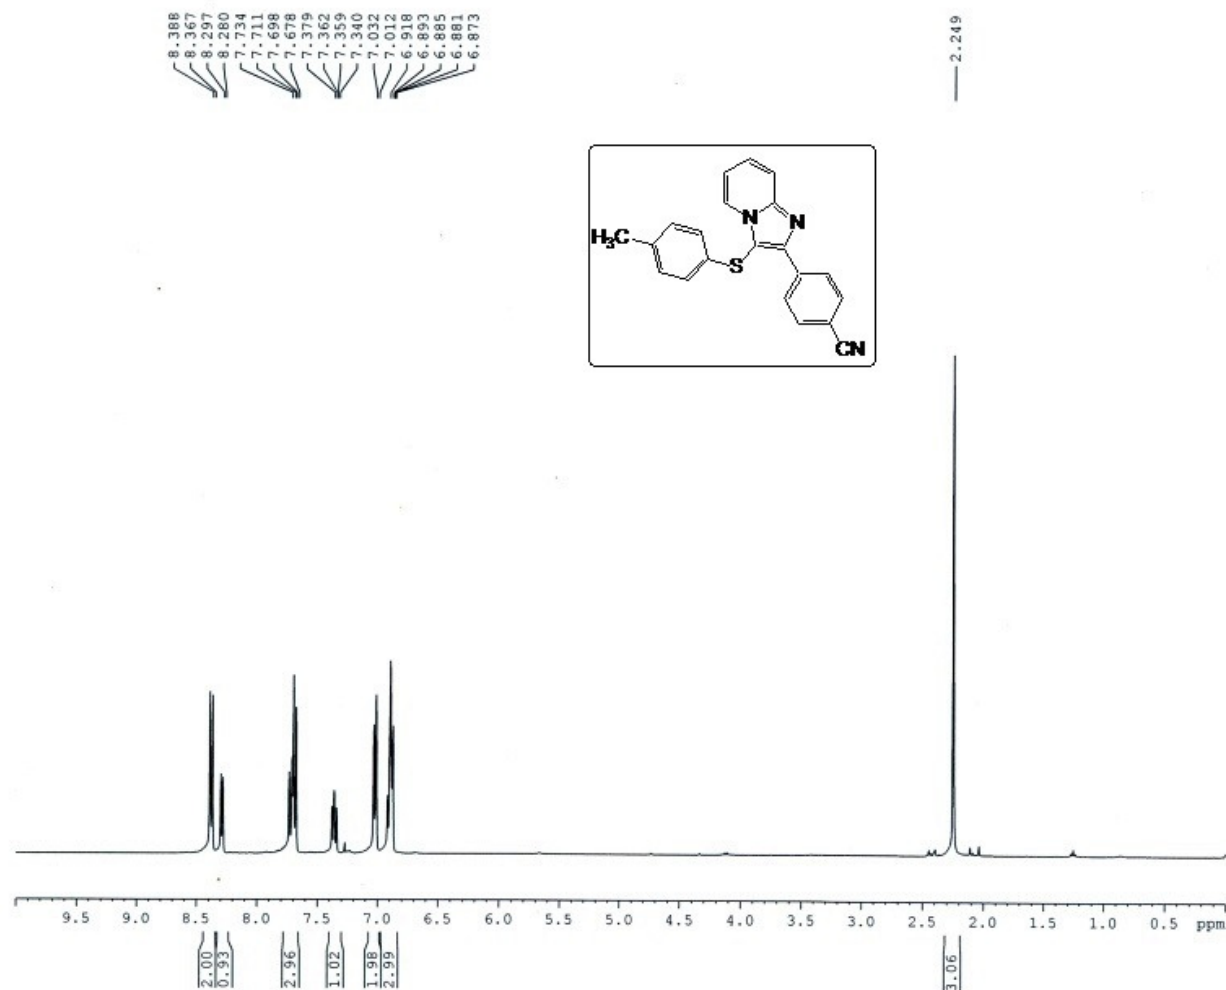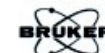

Current Data Parameters  
 NAME Dr. A HAJRA 2014  
 EXPNO 950  
 PROCNO 1

F2 - Acquisition Parameters  
 Date\_ 20141010  
 Time\_ 20.47  
 INSTRUM spect  
 PROBHD 5 mm PABBO BB/  
 PULPROG zg30  
 TD 32768  
 SOLVENT CDC13  
 NS 24  
 DS 2  
 SWH 8223.685 Hz  
 FIDRES 0.250967 Hz  
 AQ 1.9923444 sec  
 RG 37.83  
 DW 60.800 usec  
 DE 6.50 usec  
 TE 296.1 K  
 D1 1.00000000 sec  
 TD0 1

===== CHANNEL f1 =====  
 NUC1 1H  
 P1 14.75 usec  
 PLW1 11.99499989 W  
 SF01 400.1524711 MHz

F2 - Processing parameters  
 SI 16384  
 SF 400.1500037 MHz  
 WDW EM  
 SSB 0  
 LB 0.30 Hz  
 GB 0  
 PC 1.00

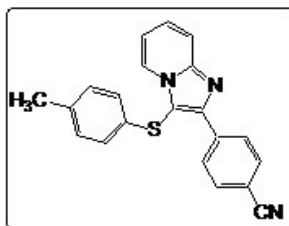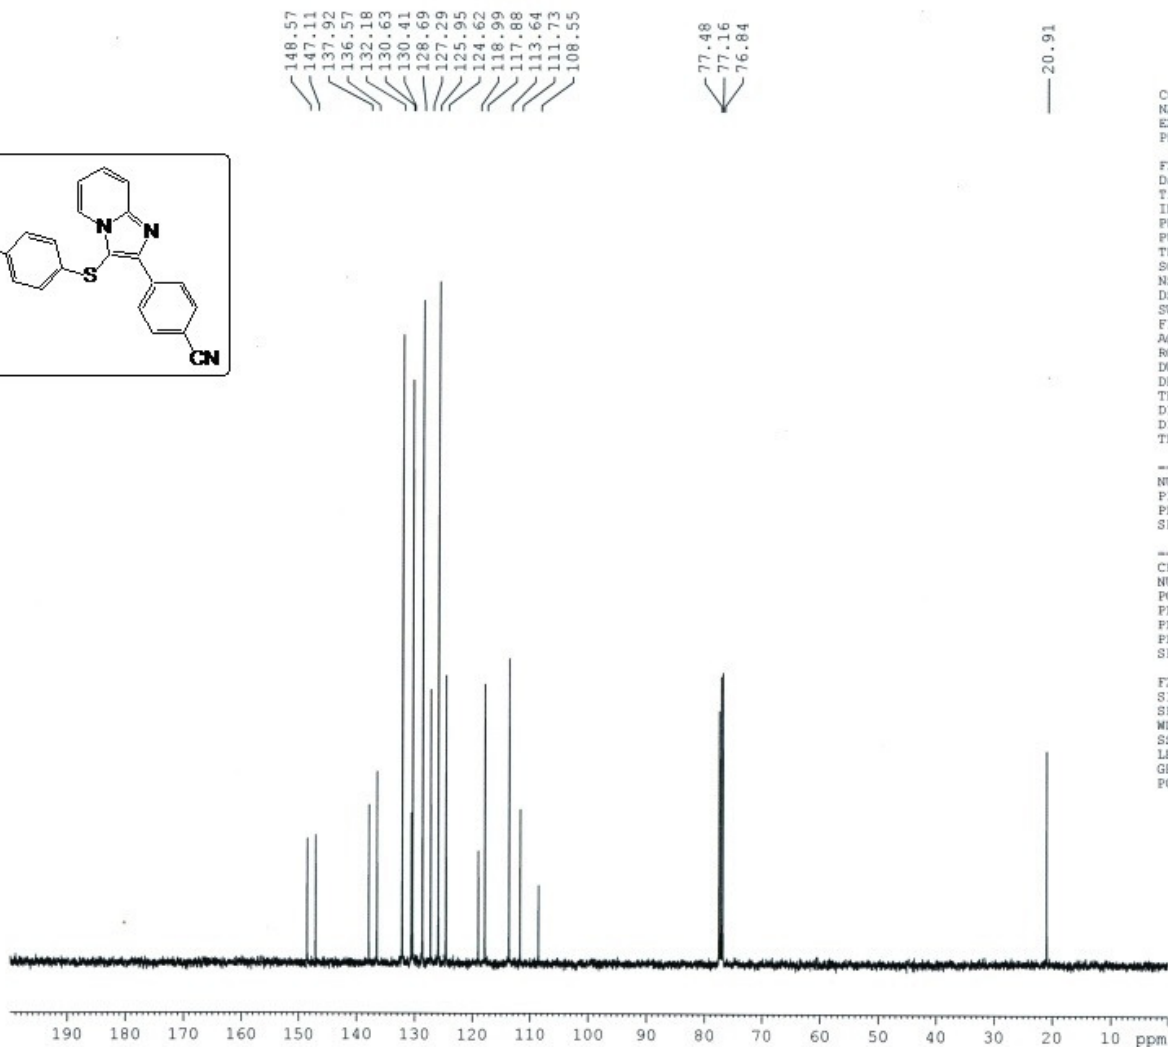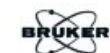

Current Data Parameters  
 NAME Dr. A HAJRA 2014  
 EXPNO 952  
 PROCNO 1

F2 - Acquisition Parameters  
 Date\_ 20141011  
 Time\_ 11.43  
 INSTRUM spect  
 PROBHD 5 mm PABBO BB/  
 PULPROG zgpg30  
 TD 32768  
 SOLVENT CDCl3  
 NS 160  
 DS 2  
 SWH 24038.461 Hz  
 FIDRES 0.733596 Hz  
 AQ 0.6816244 sec  
 RG 37.83  
 DW 20.800 usec  
 DE 6.50 usec  
 TE 298.6 K  
 D1 2.00000000 sec  
 D11 0.03000000 sec  
 TD0 1

----- CHANNEL f1 -----  
 NUC1 13C  
 P1 8.90 usec  
 PLW1 54.00000000 W  
 SFO1 100.6278588 MHz

----- CHANNEL f2 -----  
 CPDPRG2 waltz16  
 NUC2 1H  
 PCPD2 80.00 usec  
 PLW2 12.00000000 W  
 PLW12 0.40792999 W  
 PLW13 0.26107001 W  
 SFO2 400.1516006 MHz

F2 - Processing parameters  
 SI 16384  
 SF 100.6177968 MHz  
 MEW EM  
 SSB 0  
 LB 1.00 Hz  
 GB 0  
 PC 1.40

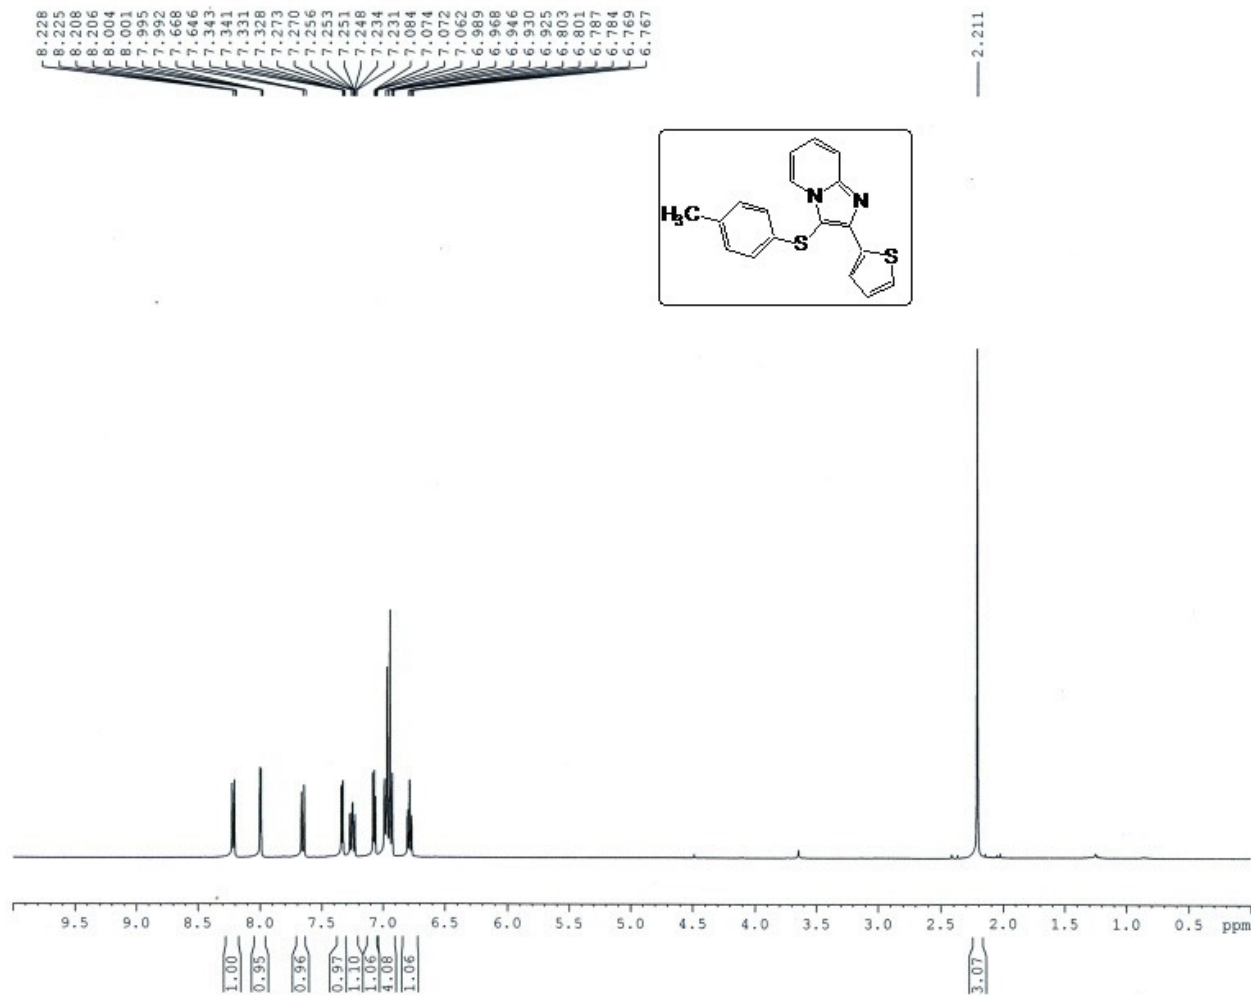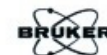

Current Data Parameters  
 NAME Dr. A HAJRA 2014  
 EXPNO 951  
 PROCNO 1

F2 - Acquisition Parameters  
 Date\_ 20141010  
 Time 20.50  
 INSTRUM spect  
 PROBHD 5 mm PABBO BB/  
 PULPROG zg30  
 TD 32768  
 SOLVENT CDC13  
 NS 24  
 DS 2  
 SWH 8223.685 Hz  
 FIDRES 0.250967 Hz  
 AQ 1.9923444 sec  
 RG 32.25  
 DW 60.800 usec  
 DE 6.50 usec  
 TE 296.0 K  
 D1 1.00000000 sec  
 TDO 1

===== CHANNEL f1 =====  
 NUC1 1H  
 P1 14.75 usec  
 PLW1 11.99499989 W  
 SFO1 400.1524711 MHz

F2 - Processing parameters  
 SI 16384  
 SF 400.1500136 MHz  
 WDW EM  
 SSB 0  
 LB 0.30 Hz  
 GB 0  
 PC 1.00

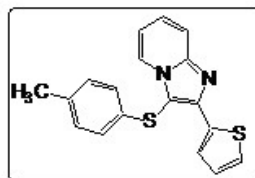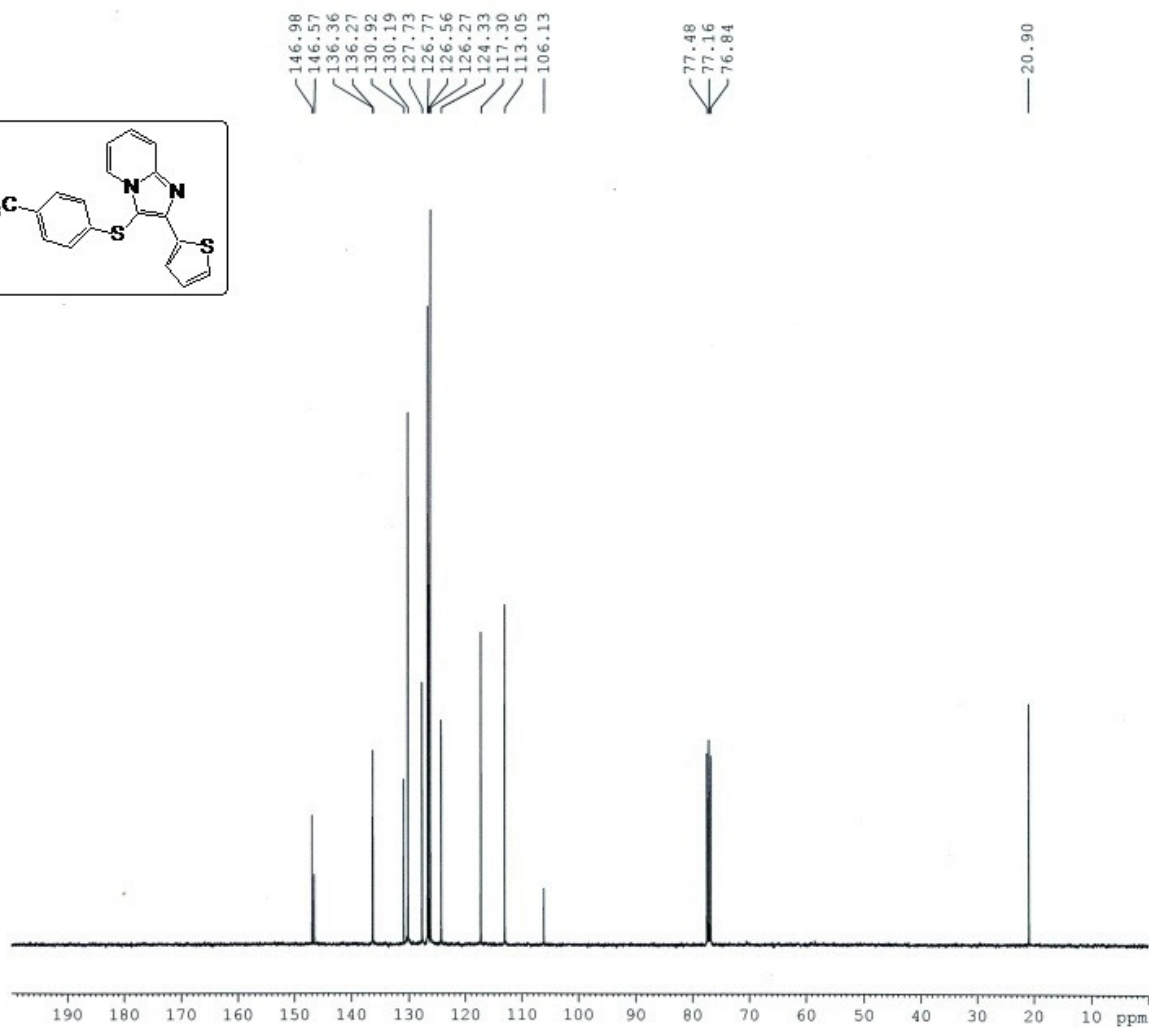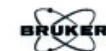

Current Data Parameters  
NAME Dr. A HAJRA 2014  
EXPNO 959  
PROCNO 1

F2 - Acquisition Parameters  
Date\_ 20141012  
Time 11.04  
INSTRUM spect  
PROBHD 5 mm PABBO BB/  
PULPROG zgpg30  
TD 32768  
SOLVENT CDCl3  
NS 400  
DS 2  
SWH 24038.461 Hz  
FIDRES 0.733596 Hz  
AQ 0.6816244 sec  
RG 32.25  
DM 20.800 usec  
DE 6.50 usec  
TE 299.0 K  
D1 2.0000000 sec  
D11 0.0300000 sec  
TD0 1

===== CHANNEL f1 =====  
NUC1 13C  
P1 8.90 usec  
PLW1 54.0000000 W  
SFO1 100.6278588 MHz

===== CHANNEL f2 =====  
CPDPRG2 waltz16  
NUC2 1H  
PCPD2 80.00 usec  
PLW2 12.0000000 W  
PLW12 0.40792999 W  
PLW13 0.24107001 W  
SFO2 400.1516006 MHz

F2 - Processing parameters  
SI 16384  
SF 100.6177998 MHz  
WDW EM  
SSB 0  
LB 1.00 Hz  
GB 0  
PC 1.40

8.204  
8.199  
8.186  
8.086  
8.069  
7.422  
7.420  
7.417  
7.403  
7.399  
7.383  
7.345  
7.342  
7.339  
7.329  
7.324  
7.318  
7.305  
7.187  
7.164  
7.160  
7.146  
7.144  
7.130  
7.127  
7.083  
7.069  
7.064  
7.059  
7.049  
7.047  
7.035  
7.032  
7.029  
6.971  
6.968  
6.963  
6.950  
6.948  
6.902  
6.684  
6.667

2.686

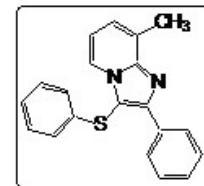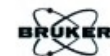

Current Data Parameters  
NAME Dr. A HAJRA 2014  
EXPNO 1018  
PROCNO 1

F2 - Acquisition Parameters  
Date 20141026  
Time 19.25  
INSTRUM spect  
PROBHD 5 mm PABBO BB/  
PULPROG zg30  
TD 32768  
SOLVENT CDCl3  
NS 28  
DS 2  
SWH 8223.685 Hz  
FIDRES 0.250967 Hz  
AQ 1.9923444 sec  
RG 30.11  
DW 60.800 usec  
DE 6.50 usec  
TE 295.9 K  
D1 1.00000000 sec  
TD0 1

----- CHANNEL f1 -----  
NUC1 1H  
P1 14.75 usec  
PLW1 11.99499989 W  
SFO1 400.1524711 MHz

F2 - Processing parameters  
SI 16384  
SF 400.1500322 MHz  
WDW EM  
SSB 0  
LB 0.30 Hz  
GB 0  
PC 1.00

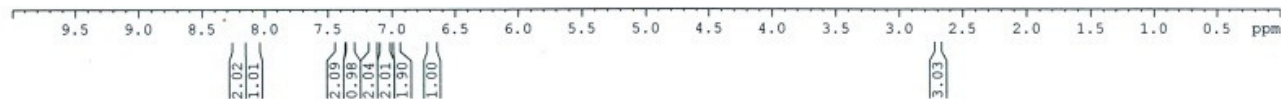

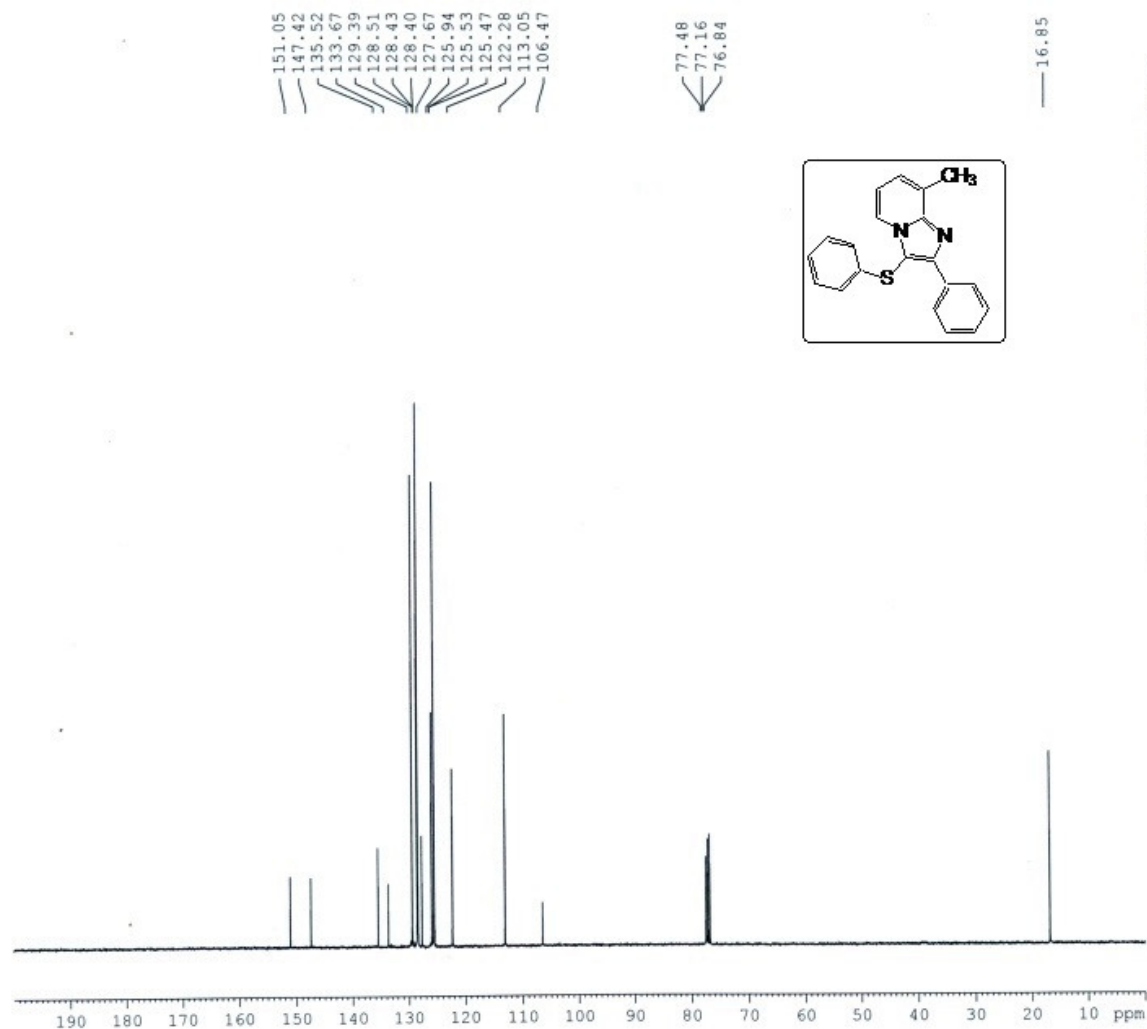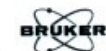

Current Data Parameters  
 NAME Dr. A. HAJRA 2014  
 EXPNO 1023  
 PROCNO 1

F2 - Acquisition Parameters  
 Date\_ 20141026  
 Time 20.15  
 INSTRUM spect  
 PROBHD 5 mm PABBO BB/  
 PULPROG zgpg30  
 TD 32768  
 SOLVENT CDCl3  
 NS 200  
 DS 2  
 SWH 24038.461 Hz  
 FIDRES 0.733596 Hz  
 AQ 0.6816244 sec  
 RG 30.11  
 DM 20.800 usec  
 DE 6.50 usec  
 TE 296.5 K  
 D1 2.00000000 sec  
 D11 0.03000000 sec  
 TDO 1

----- CHANNEL f1 -----  
 NUC1 13C  
 P1 8.90 usec  
 PLW1 54.00000000 W  
 SFO1 100.6278588 MHz

----- CHANNEL f2 -----  
 CPDPRG2 waltz16  
 NUC2 1H  
 FCD2 80.00 usec  
 PLW2 12.00000000 W  
 PLW12 0.40792999 W  
 PLW13 0.26107001 W  
 SFO2 400.1516006 MHz

F2 - Processing parameters  
 SI 16384  
 SF 100.6178026 MHz  
 WDW EM  
 SSB 0  
 LB 1.00 Hz  
 GB 0  
 PC 1.40

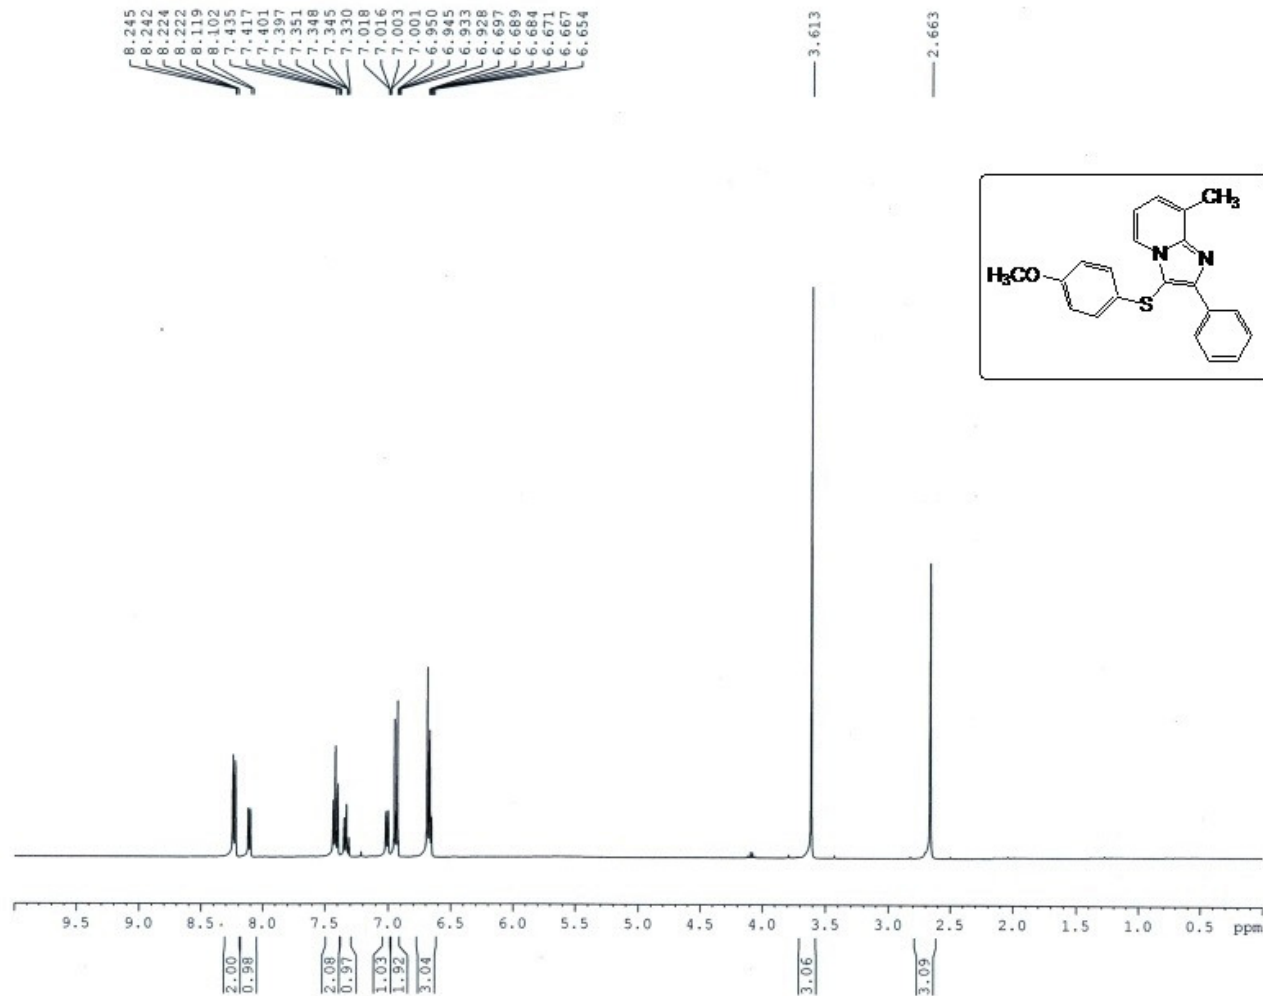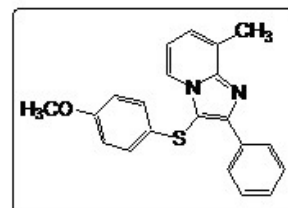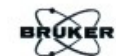

Current Data Parameters  
 NAME Dr. A HAJRA 2014  
 EXPNO 1020  
 PROCNO 1

F2 - Acquisition Parameters  
 Date\_ 20141026  
 Time 19.43  
 INSTRUM spect  
 PROBHD 5 mm PABBO BB/  
 PULPROG zg30  
 TD 32768  
 SOLVENT CDCl3  
 NS 20  
 DS 2  
 SWH 8223.685 Hz  
 FIDRES 0.250967 Hz  
 AQ 1.9923444 sec  
 RG 12.92  
 DW 60.800 usec  
 DE 6.50 usec  
 TE 295.7 K  
 D1 1.00000000 sec  
 TD0 1

===== CHANNEL f1 =====  
 NUC1 1H  
 P1 14.75 usec  
 PLW1 11.99499989 W  
 SFO1 400.1524711 MHz

F2 - Processing parameters  
 SI 16384  
 SF 400.1500272 MHz  
 WDW EM  
 SSB 0  
 LB 0.30 Hz  
 GB 0  
 PC 1.00

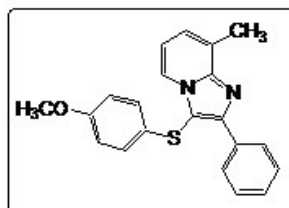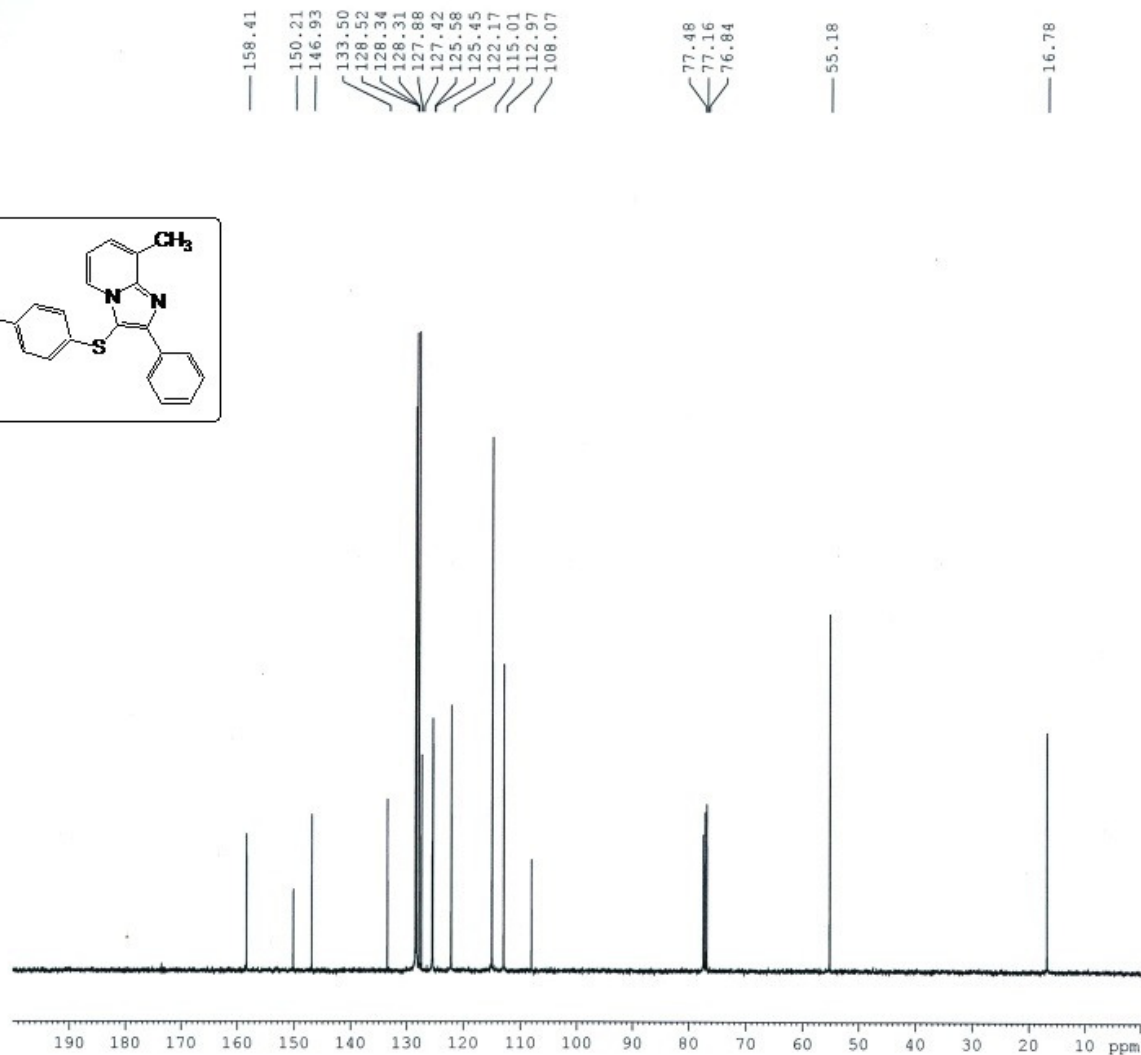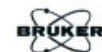

Current Data Parameters  
 NAME Dr. A HAJRA 2014  
 EXPNO 1021  
 PROCNO 1

F2 - Acquisition Parameters  
 Date\_ 20141026  
 Time 19.52  
 INSTRUM spect  
 PROBRD 5 mm PABBO BB/  
 PULPROG zgpg30  
 TD 32768  
 SOLVENT CDCl3  
 NS 120  
 DS 2  
 SWH 24038.461 Hz  
 FIDRES 0.733596 Hz  
 AQ 0.6816244 sec  
 RG 12.92  
 DM 20.800 usec  
 DE 6.50 usec  
 TE 296.6 K  
 D1 2.00000000 sec  
 D11 0.03000000 sec  
 TD0 1

\*\*\*\*\* CHANNEL f1 \*\*\*\*\*  
 NUC1 13C  
 P1 8.90 usec  
 PLW1 54.00000000 W  
 SFO1 100.6278988 MHz

\*\*\*\*\* CHANNEL f2 \*\*\*\*\*  
 CPDPRG2 waltz16  
 NUC2 1H  
 PCPD2 80.00 usec  
 PLW2 12.00000000 W  
 PLW12 0.40792999 W  
 PLW13 0.26107001 W  
 SFO2 400.1516006 MHz

F2 - Processing parameters  
 SI 16384  
 SF 100.6178100 MHz  
 WDW EM  
 SSB 0  
 LB 1.00 Hz  
 GB 0  
 PC 1.40

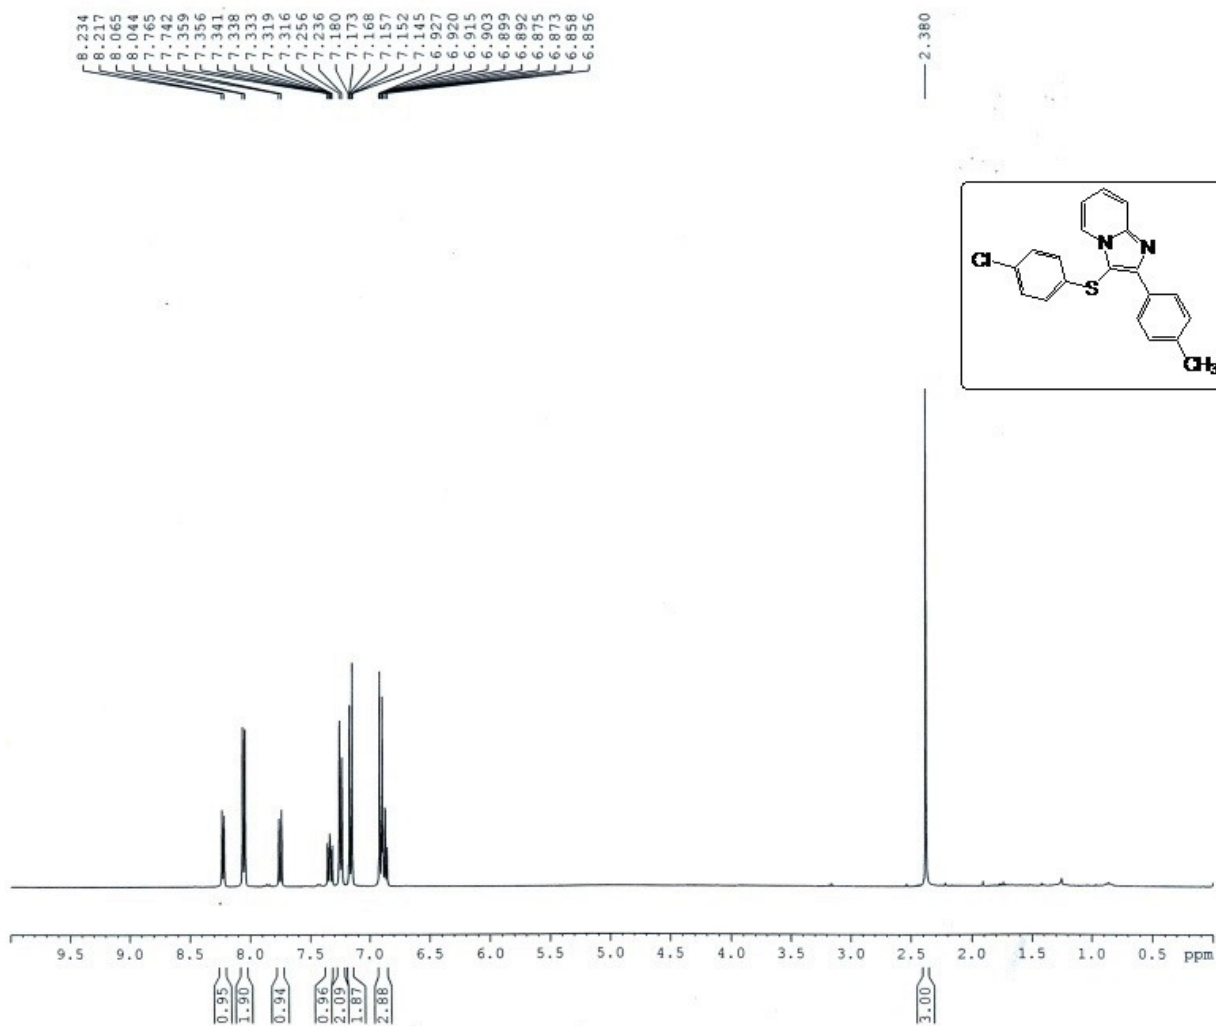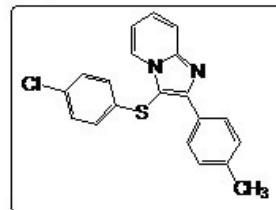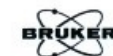

Current Data Parameters  
 NAME Dr. A HAJRA 2014  
 EXPNO 981  
 PROCNO 1

F2 - Acquisition Parameters  
 Date\_ 20141015  
 Time\_ 20.18  
 INSTRUM spect  
 PROBHD 5 mm PABBO BB/  
 PULPROG zg30  
 TD 32768  
 SOLVENT CDCl3  
 NS 24  
 DS 2  
 SWH 8223.685 Hz  
 FIDRES 0.250967 Hz  
 AQ 1.9923444 sec  
 RG 87.66  
 DW 60.800 usec  
 DE 6.50 usec  
 TE 298.1 K  
 D1 1.00000000 sec  
 TDO 1

===== CHANNEL f1 =====  
 NUC1 1H  
 P1 14.75 usec  
 PLW1 11.99499989 W  
 SFO1 400.1524711 MHz

F2 - Processing parameters  
 SI 16384  
 SF 400.1500101 MHz  
 WDW EM  
 SSB 0  
 LB 0.30 Hz  
 GB 0  
 PC 1.00

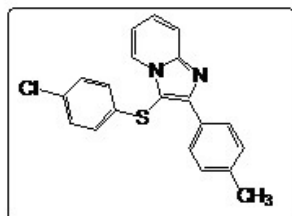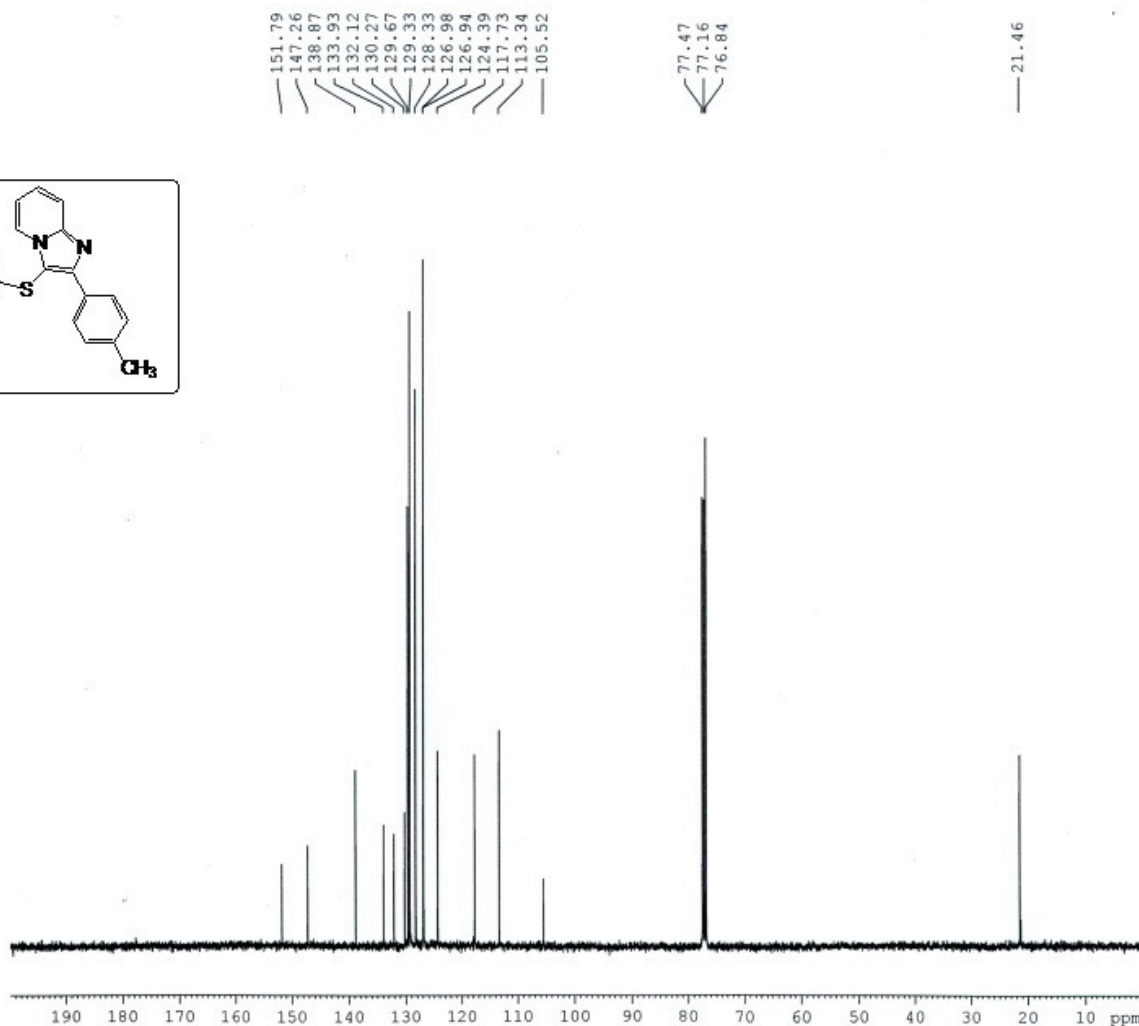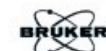

Current Data Parameters  
 NAME Dr. A HAJRA 2014  
 EXPNO 982  
 PROCNO 1

F2 - Acquisition Parameters  
 Date\_ 20141015  
 Time\_ 20.39  
 INSTRUM spect  
 PROBHD 5 mm PABBO BB/  
 PULPROG zgpg30  
 TD 32768  
 SOLVENT CDCl3  
 NS 400  
 DS 2  
 SWH 24038.461 Hz  
 FIDRES 0.733596 Hz  
 AQ 0.6816244 sec  
 RG 87.66  
 DW 20.800 usec  
 DE 6.50 usec  
 TE 299.2 K  
 D1 2.00000000 sec  
 D11 0.03000000 sec  
 TDO 1

----- CHANNEL f1 -----  
 NUC1 13C  
 P1 8.90 usec  
 PLW1 54.00000000 W  
 SFO1 100.6278588 MHz

----- CHANNEL f2 -----  
 CPDPRG2 waltz16  
 NUC2 1H  
 FCPD2 80.00 usec  
 PLW2 12.00000000 W  
 PLW12 0.40792999 W  
 PLW13 0.26107001 W  
 SFO2 400.1516006 MHz

F2 - Processing parameters  
 SI 16384  
 SF 100.6177880 MHz  
 WDW EM  
 SSB 0  
 LB 1.00 Hz  
 GB 0  
 PC 1.40

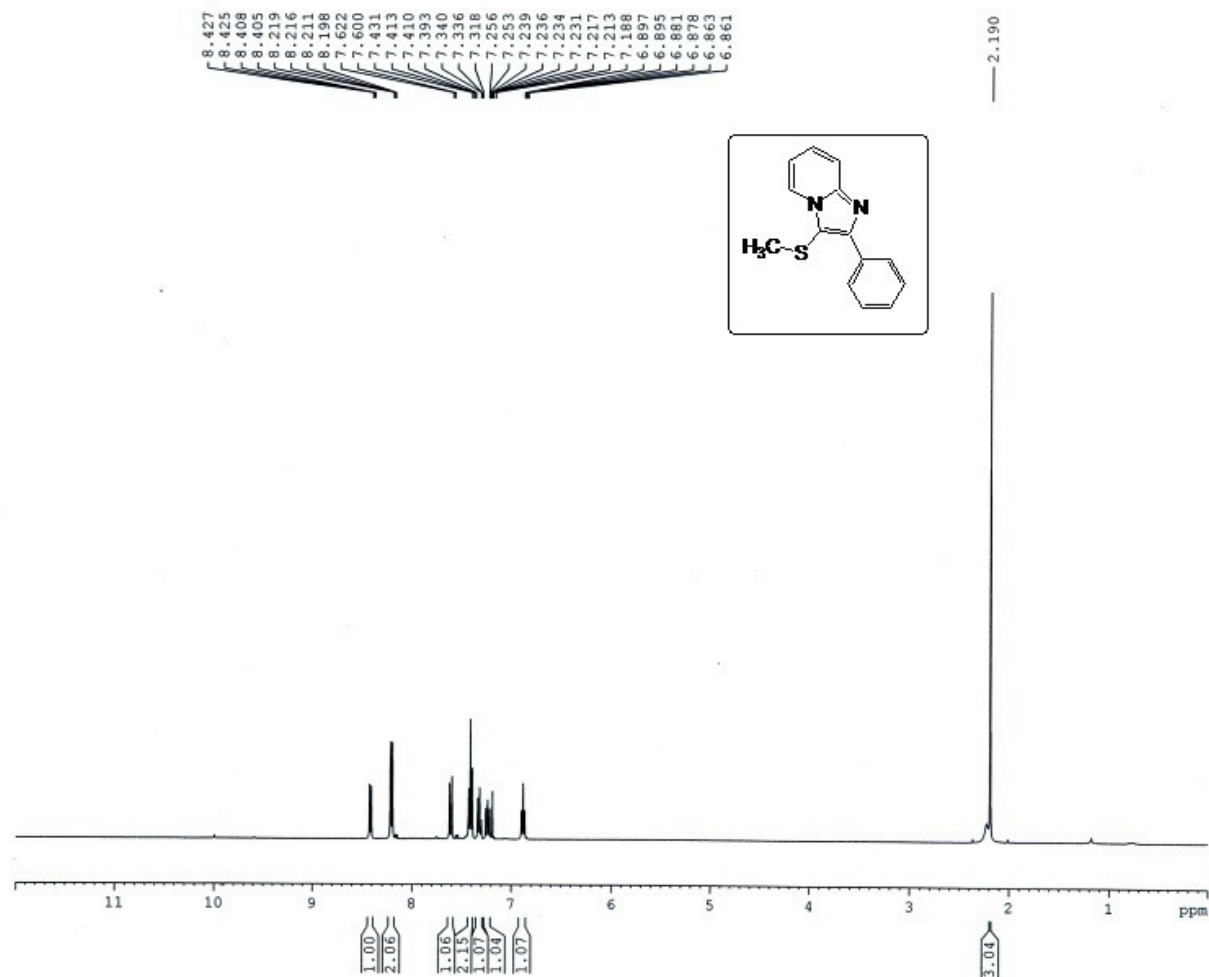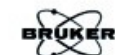

Current Data Parameters  
 NAME Dr. A HAJRA 2014  
 EXPNO 738  
 PROCNO 1

F2 - Acquisition Parameters  
 Date\_ 20140816  
 Time 20.35  
 INSTRUM spect  
 PROBHD 5 mm PABBO BB/  
 PULPROG zg30  
 TD 32768  
 SOLVENT CDC13  
 NS 32  
 DS 2  
 SWH 8223.685 Hz  
 FIDRES 0.250967 Hz  
 AQ 1.9923444 sec  
 RG 87.66  
 DW 60.800 usec  
 DE 6.50 usec  
 TE 296.2 K  
 D1 1.00000000 sec  
 TDO 1

----- CHANNEL f1 -----  
 NUC1 1H  
 P1 14.75 usec  
 PLW1 11.99499989 W  
 SFO1 400.1524711 MHz

F2 - Processing parameters  
 SI 16384  
 SF 400.1500377 MHz  
 WDW EM  
 SSB 0  
 LB 0.30 Hz  
 GB 0  
 PC 1.00

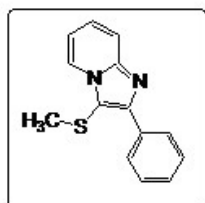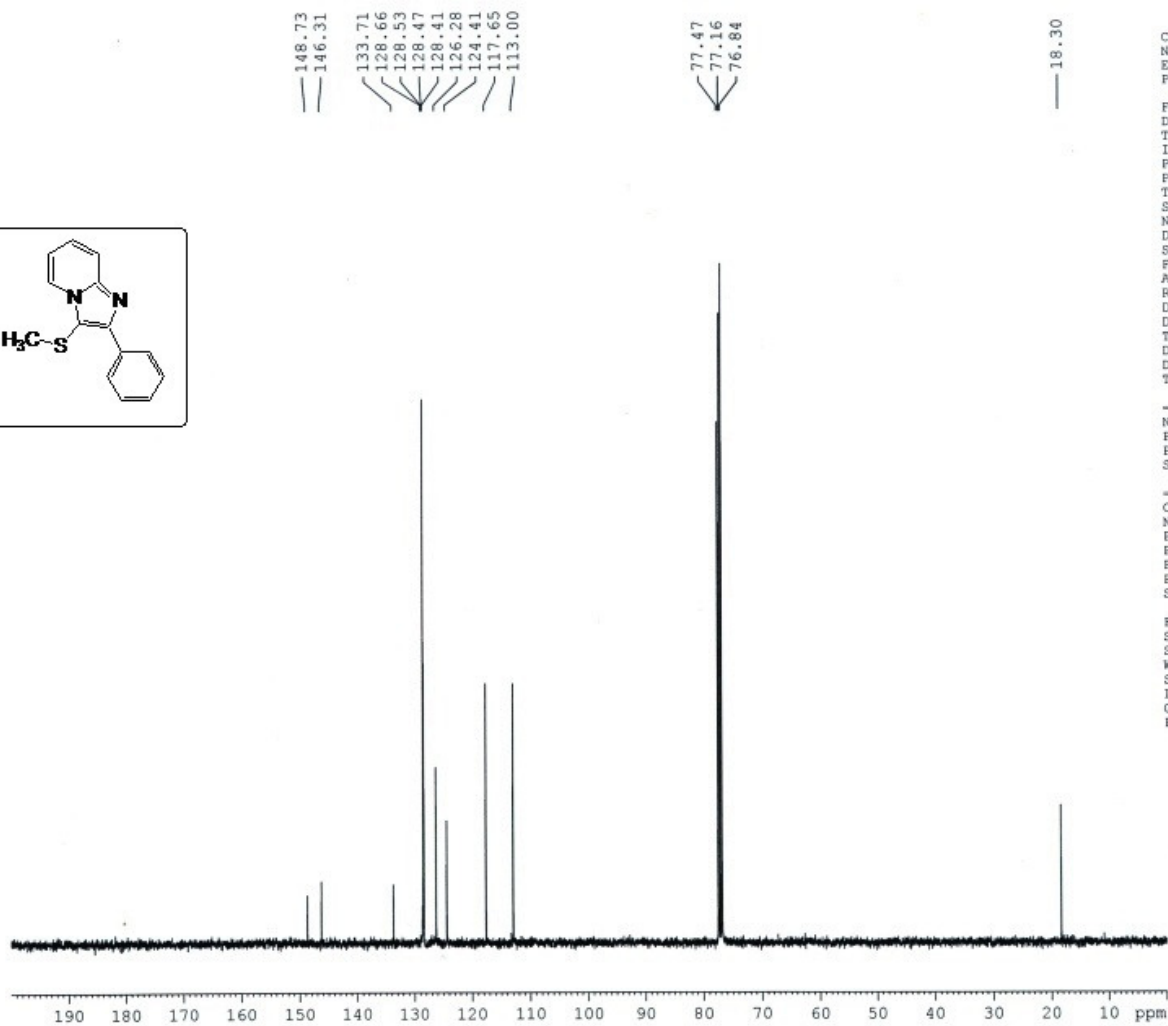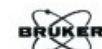

Current Data Parameters  
 NAME Dr. A HAJRA 2014  
 EXPNO 739  
 PROCNO 1

F2 - Acquisition Parameters  
 Date\_ 20140816  
 Time 21.05  
 INSTRUM spect  
 PROBHD 5 mm PABBO BB/  
 PULPROG zgpg30  
 TD 32768  
 SOLVENT CDCl3  
 NS 512  
 DS 2  
 SWH 24038.461 Hz  
 FIDRES 0.733596 Hz  
 AQ 0.6816244 sec  
 RG 87.66  
 DW 20.800 usec  
 DE 6.50 usec  
 TE 297.0 K  
 D1 2.00000000 sec  
 D11 0.03000000 sec  
 TD0 1

----- CHANNEL f1 -----  
 NUC1 13C  
 P1 8.90 usec  
 PLW1 54.00000000 W  
 SFO1 100.6278588 MHz

----- CHANNEL f2 -----  
 CPDPRG2 waltz16  
 NUC2 1H  
 PCPD2 80.00 usec  
 PLW2 12.00000000 W  
 PLW12 0.40792999 W  
 PLW13 0.26107001 W  
 SFO2 400.1516006 MHz

F2 - Processing parameters  
 SI 16384  
 SF 100.6177865 MHz  
 WDW EM  
 SSB 0  
 LB 1.00 Hz  
 GB 0  
 PC 1.40

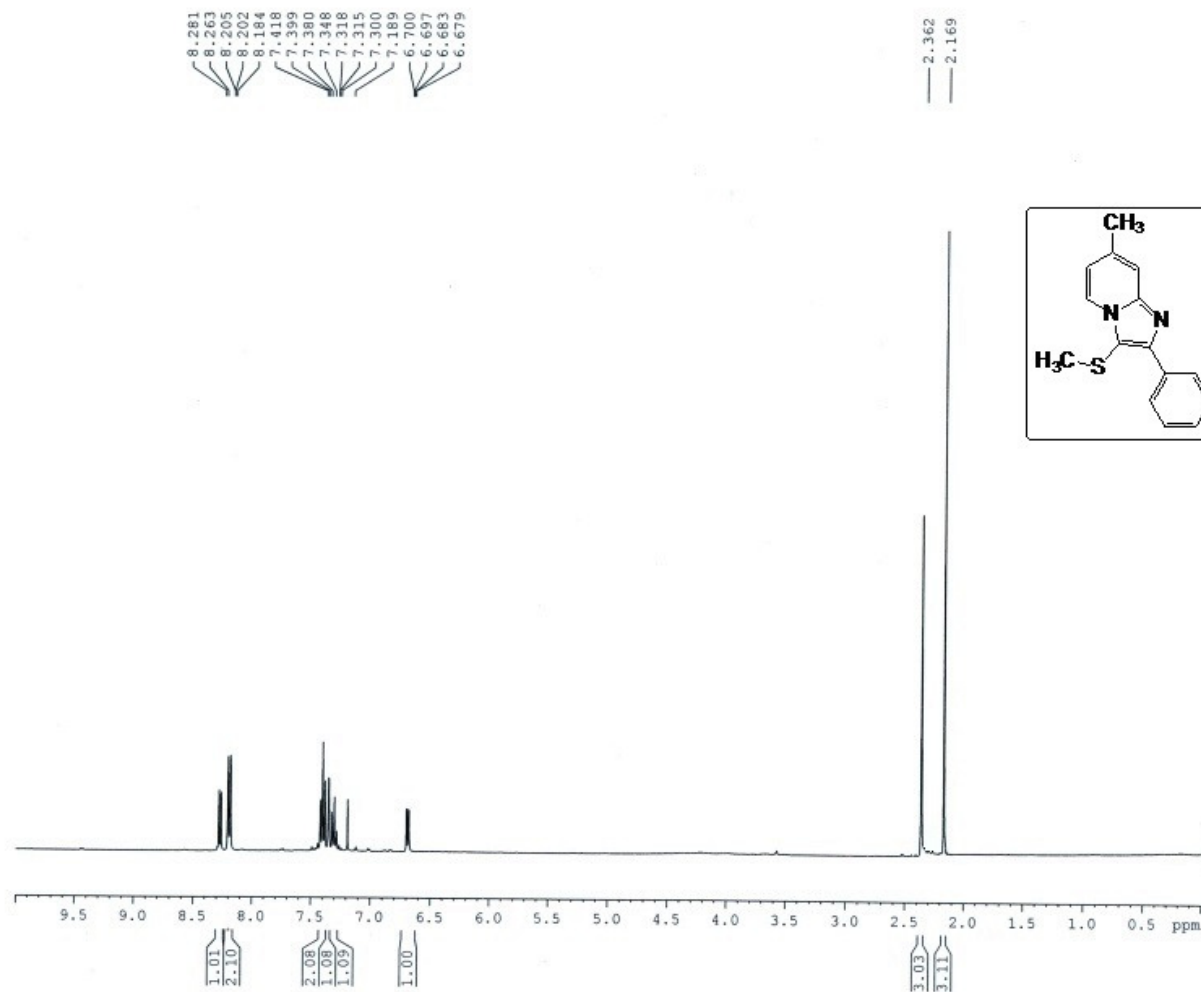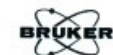

Current Data Parameters  
 NAME Dr. A HAJRA 2014  
 EXPNO 688  
 PROCNO 1

F2 - Acquisition Parameters  
 Date\_ 20140805  
 Time\_ 17.43  
 INSTRUM spect  
 PROBHD 5 mm PABBO BB/  
 PULPROG zg30  
 TD 32768  
 SOLVENT CDCl3  
 NS 32  
 DS 2  
 SWH 8223.685 Hz  
 FIDRES 0.250967 Hz  
 AQ 1.9923444 sec  
 RG 87.66  
 DW 60.800 usec  
 DE 6.50 usec  
 TE 295.1 K  
 D1 1.00000000 sec  
 TD0 1

===== CHANNEL f1 =====  
 NUC1 1H  
 P1 14.75 usec  
 PLW1 11.99499989 W  
 SFO1 400.1524711 MHz

F2 - Processing parameters  
 SI 16384  
 SF 400.1500374 MHz  
 WDW EM  
 SSB 0  
 LB 0.30 Hz  
 GB 0  
 PC 1.00

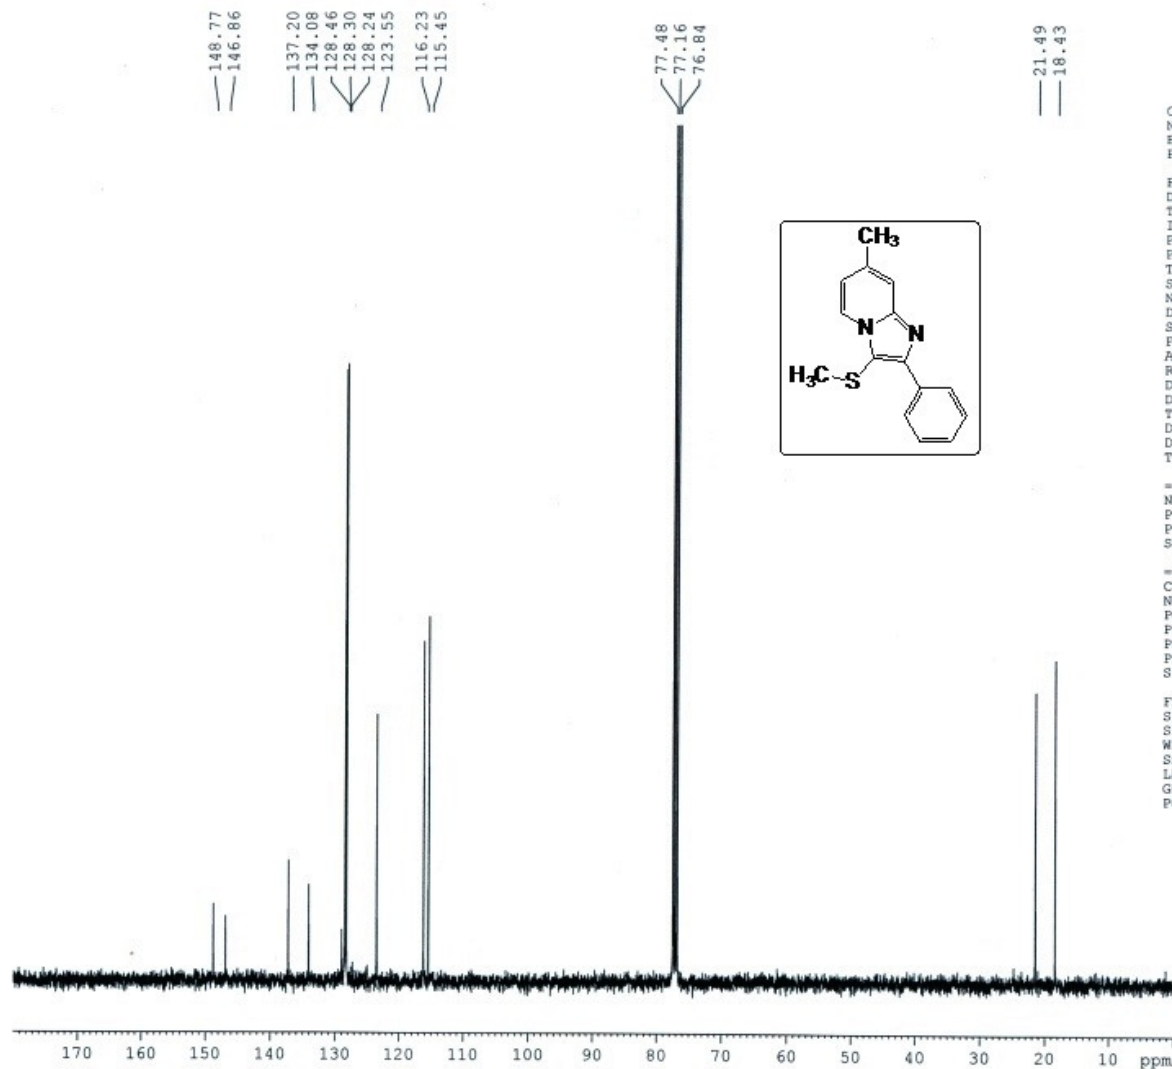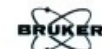

Current Data Parameters  
 NAME Dr. A HAJRA 2014  
 EXPNO 689  
 PROCNO 1

F2 - Acquisition Parameters  
 Date\_ 20140805  
 Time 18.13  
 INSTRUM spect  
 PROBHD 5 mm PABBO BB/  
 PULPROG zgpg30  
 TD 32768  
 SOLVENT CDCl<sub>3</sub>  
 NS 512  
 DS 2  
 SWH 24038.461 Hz  
 FIDRES 0.733596 Hz  
 AQ 0.6816244 sec  
 RG 87.66  
 DW 20.800 usec  
 DE 6.50 usec  
 TE 296.0 K  
 D1 2.00000000 sec  
 D11 0.03000000 sec  
 TD0 1

===== CHANNEL f1 =====  
 NUC1 13C  
 P1 8.90 usec  
 PLW1 54.00000000 W  
 SFO1 100.6278588 MHz

===== CHANNEL f2 =====  
 CPDPRG2 waltz16  
 NUC2 1H  
 PCPD2 80.00 usec  
 PLW2 12.00000000 W  
 PLW12 0.40792999 W  
 PLW13 0.26107001 W  
 SFO2 400.1516006 MHz

F2 - Processing parameters  
 SI 16384  
 SF 100.6177866 MHz  
 WDW EM  
 SSB 0  
 LB 1.00 Hz  
 GB 0  
 PC 1.40

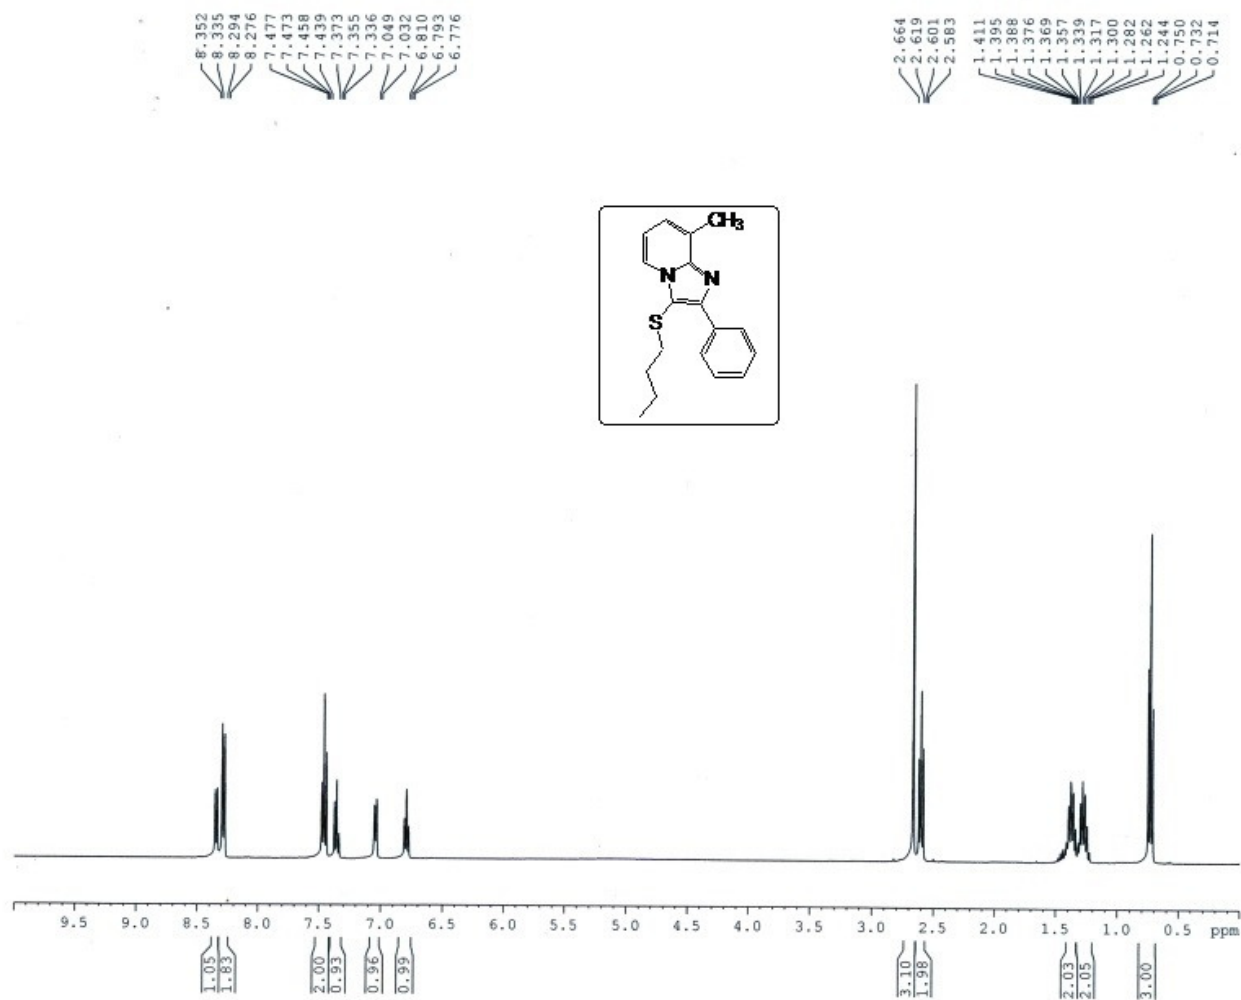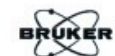

Current Data Parameters  
 NAME Dr. A HAJRA 2014  
 EXPNO 1019  
 PROCNO 1

F2 - Acquisition Parameters  
 Date\_ 20141026  
 Time 19.34  
 INSTRUM spect  
 PROBHD 5 mm PABBO BB/  
 PULPROG zg30  
 TD 32768  
 SOLVENT CDC13  
 NS 28  
 DS 2  
 SWH 8223.685 Hz  
 FIDRES 0.250967 Hz  
 AQ 1.9923444 sec  
 RG 23.55  
 DW 60.800 usec  
 DE 6.50 usec  
 TE 295.8 K  
 D1 1.00000000 sec  
 TDO 1

===== CHANNEL f1 =====  
 NUC1 1H  
 P1 14.75 usec  
 PLW1 11.99499989 W  
 SFO1 400.1524711 MHz

F2 - Processing parameters  
 SI 16384  
 SF 400.1500124 MHz  
 WDW EM  
 SSB 0  
 LB 0.30 Hz  
 GB 0  
 PC 1.00

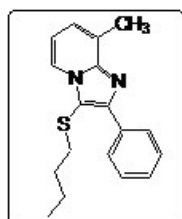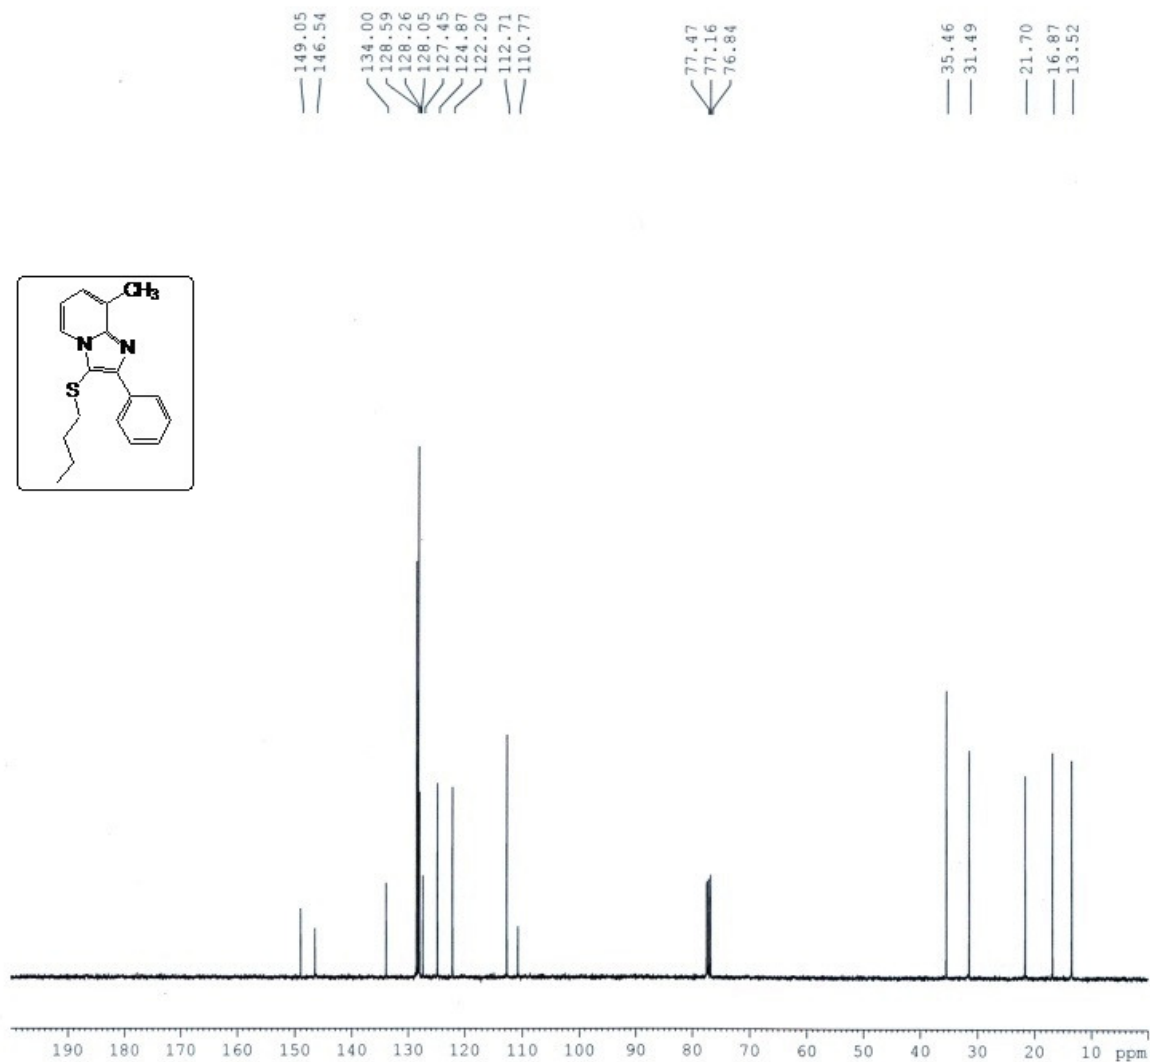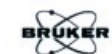

Current Data Parameters  
 NAME Dr. A HAJRA 2014  
 EXPNO 1022  
 PROCNO 1

F2 - Acquisition Parameters  
 Date\_ 20141026  
 Time\_ 20.01  
 INSTRUM spect  
 PROBHD 5 mm PABBO BB/  
 PULPROG zgpg30  
 TD 32768  
 SOLVENT CDCl3  
 NS 100  
 DS 2  
 SWH 24038.461 Hz  
 FIDRES 0.733596 Hz  
 AQ 0.6816244 sec  
 RG 23.55  
 DW 20.800 usec  
 DE 6.50 usec  
 TE 296.6 K  
 D1 2.00000000 sec  
 D11 0.03000000 sec  
 TDO 1

----- CHANNEL f1 -----  
 NUC1 13C  
 P1 8.90 usec  
 PLW1 54.00000000 W  
 SFO1 100.6278588 MHz

----- CHANNEL f2 -----  
 CPDPRG2 waltz16  
 NUC2 1H  
 PCPD2 80.00 usec  
 PLW2 12.00000000 W  
 PLW12 0.40792999 W  
 PLW13 0.26107001 W  
 SFO2 400.1516006 MHz

F2 - Processing parameters  
 SI 16384  
 SF 100.6177983 MHz  
 WDW EM  
 SSB 0  
 LB 1.00 Hz  
 GB 0  
 PC 1.40

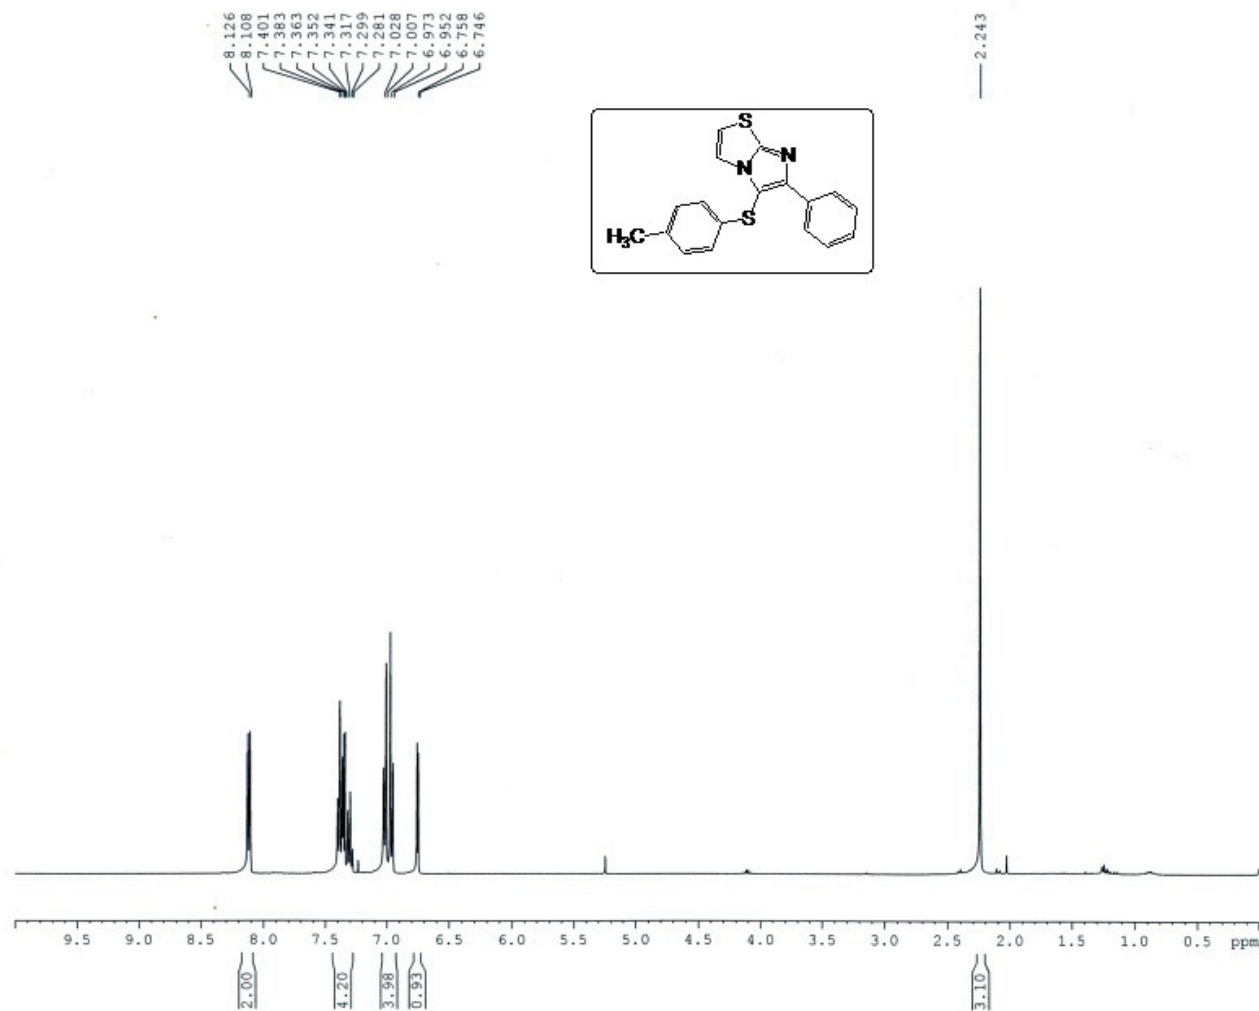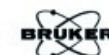

Current Data Parameters  
 NAME Dr. A HAJRA 2014  
 EXPNO 948  
 PROCNO 1

F2 - Acquisition Parameters  
 Date\_ 20141010  
 Time\_ 20.41  
 INSTRUM spect  
 PROBHD 5 mm PABBO BB/  
 PULPROG zg30  
 TD 32768  
 SOLVENT CDCl3  
 NS 24  
 DS 2  
 SWH 8223.685 Hz  
 FIDRES 0.250967 Hz  
 AQ 1.9923444 sec  
 RG 37.83  
 DW 60.800 usec  
 DE 6.50 usec  
 TE 296.1 K  
 D1 1.00000000 sec  
 TD0 1

----- CHANNEL f1 -----  
 NUC1 1H  
 P1 14.75 usec  
 PLW1 11.99499989 W  
 SFO1 400.1524711 MHz

F2 - Processing parameters  
 SI 16384  
 SF 400.1500192 MHz  
 WDW EM  
 SSB 0  
 LB 0.30 Hz  
 GB 0  
 PC 1.00

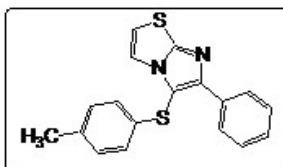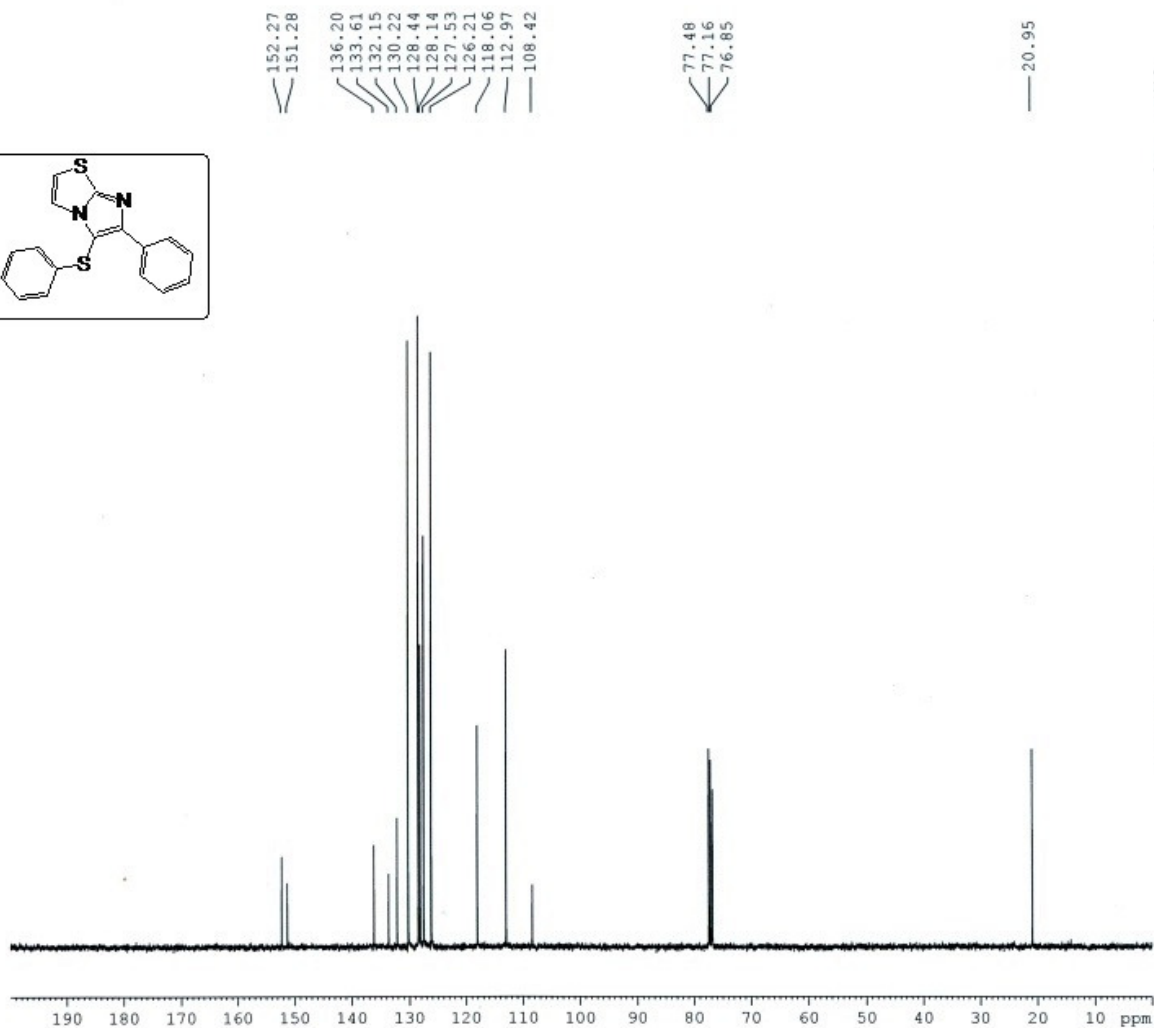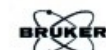

Current Data Parameters  
 NAME Dr. A RAJRA 2014  
 EXPNO 960  
 PROCNO 1

F2 - Acquisition Parameters  
 Date\_ 20141012  
 Time 12.29  
 INSTRUM spect  
 PROBHD 5 mm PABBO BB/  
 PULPROG zgpg30  
 TD 32768  
 SOLVENT CDCl3  
 NS 160  
 DS 2  
 SWH 24038.461 Hz  
 FIDRES 0.733596 Hz  
 AQ 0.6816244 sec  
 RG 37.83  
 DW 20.800 usec  
 DE 6.50 usec  
 TE 299.5 K  
 D1 2.00000000 sec  
 D11 0.03000000 sec  
 TD0 1

===== CHANNEL f1 =====  
 NUC1 13C  
 P1 8.90 usec  
 PLW1 54.00000000 W  
 SFO1 100.6278588 MHz

===== CHANNEL f2 =====  
 CPDPRG2 waltz16  
 NUC2 1H  
 PCPD2 80.00 usec  
 PLW2 12.00000000 W  
 PLW12 0.40752999 W  
 PLW13 0.26107001 W  
 SFO2 400.1516006 MHz

F2 - Processing parameters  
 SI 16384  
 SF 100.6177954 MHz  
 WDW EM  
 SSB 0  
 LB 1.00 Hz  
 GB 0  
 PC 1.40

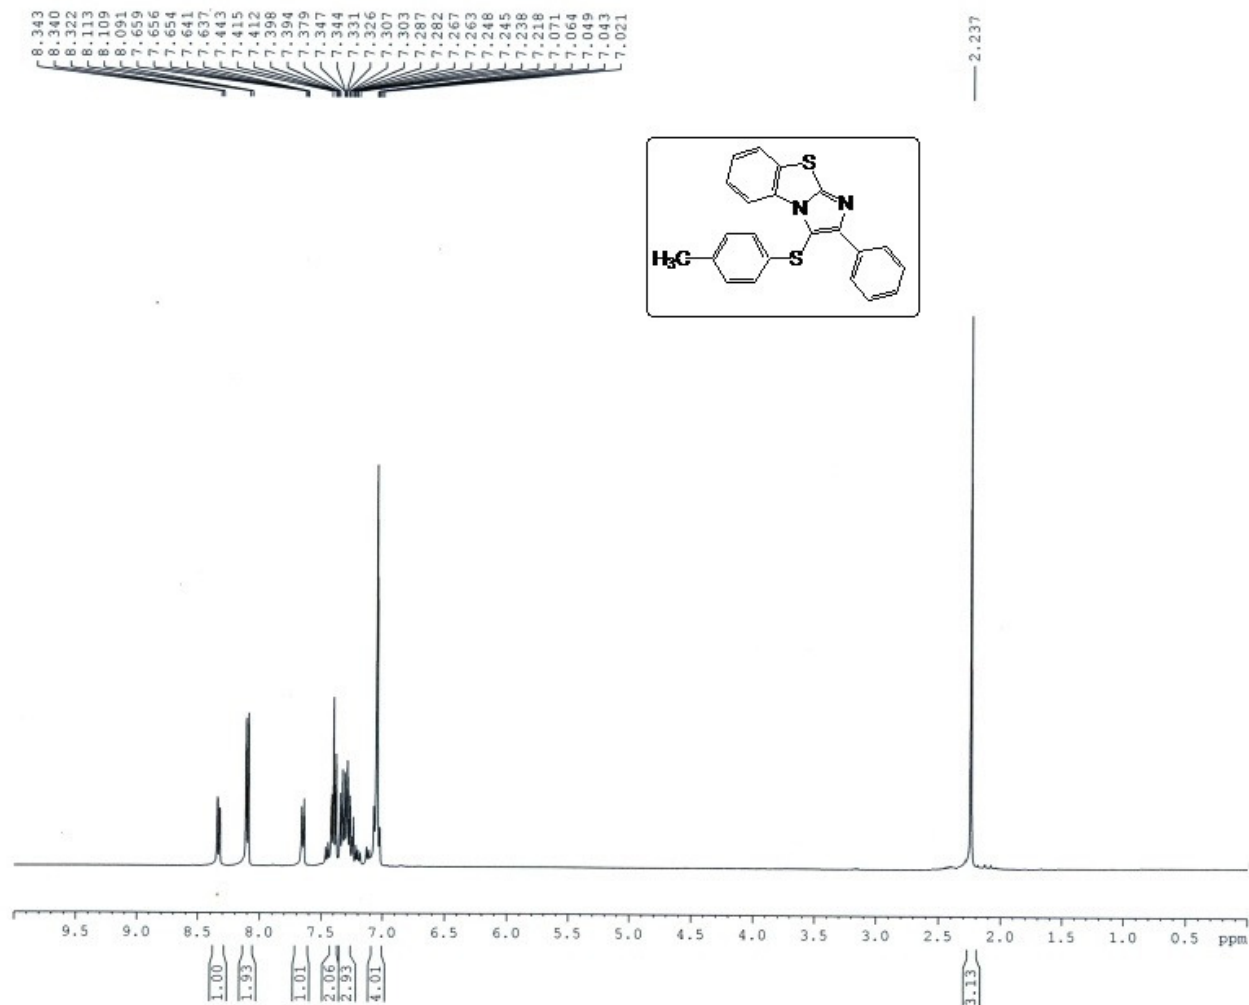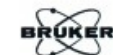

Current Data Parameters  
 NAME Dr. A HAJRA 2014  
 EXPNO 947  
 PROCNO 1

F2 - Acquisition Parameters  
 Date\_ 20141010  
 Time 20.38  
 INSTRUM spect  
 PROBHD 5 mm PABBO BB/  
 PULPROG zg30  
 TD 32768  
 SOLVENT CDCl3  
 NS 24  
 DS 2  
 SWH 8223.685 Hz  
 FIDRES 0.250967 Hz  
 AQ 1.9923444 sec  
 RG 47.25  
 DW 60.800 usec  
 DE 6.50 usec  
 TE 296.2 K  
 D1 1.00000000 sec  
 TD0 1

===== CHANNEL f1 =====  
 NUC1 1H  
 P1 14.75 usec  
 PLW1 11.99499989 W  
 SFO1 400.1524711 MHz

F2 - Processing parameters  
 SI 16384  
 SF 400.1500172 MHz  
 WDW EM  
 SSB 0  
 LB 0.30 Hz  
 GB 0  
 PC 1.00

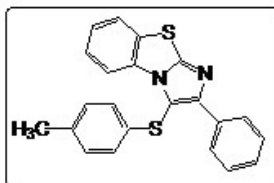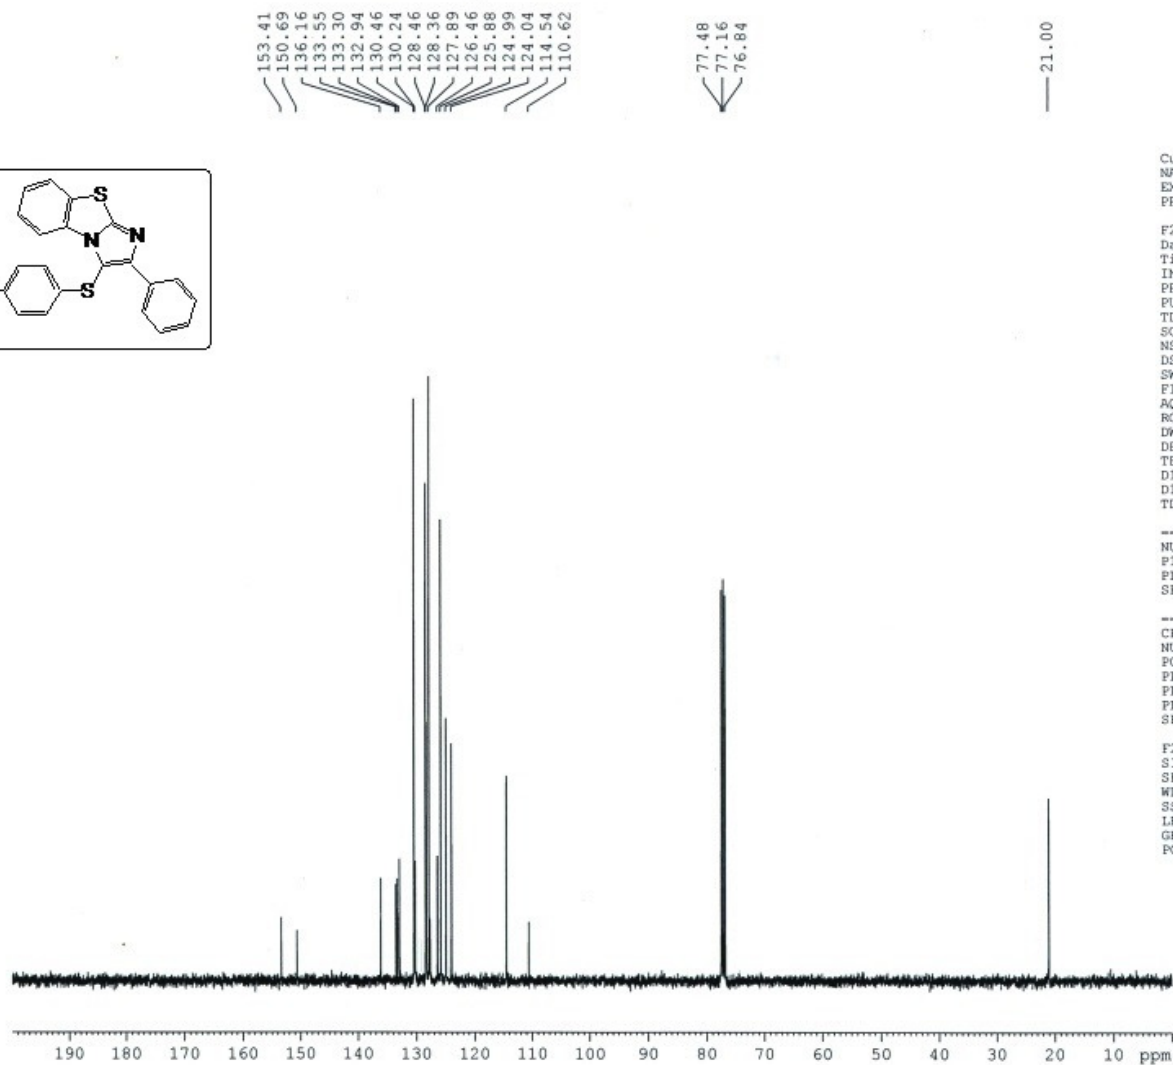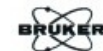

Current Data Parameters  
 NAME Dr. A HAJRA 2014  
 EXPNO 953  
 PROCNO 1

F2 - Acquisition Parameters  
 Date\_ 20141011  
 Time\_ 11.56  
 INSTRUM spect  
 PROBHD 5 mm PABBO BB/  
 PULPROG zgpg30  
 TD 32768  
 SOLVENT CDCl3  
 NS 240  
 DS 2  
 SWH 24038.461 Hz  
 FIDRES 0.733596 Hz  
 AQ 0.6816244 sec  
 RG 47.25  
 DW 20.800 usec  
 DE 6.50 usec  
 TE 298.7 K  
 D1 2.00000000 sec  
 D11 0.03000000 sec  
 TD0 1

----- CHANNEL f1 -----  
 NUC1 13C  
 P1 8.90 usec  
 PLW1 54.00000000 W  
 SFO1 100.6278588 MHz

----- CHANNEL f2 -----  
 CPDPRG2 waltz16  
 NUC2 1H  
 PCPD2 80.00 usec  
 PLW2 12.00000000 W  
 PLW12 0.40792999 W  
 PLW13 0.26107001 W  
 SFO2 400.1516006 MHz

F2 - Processing parameters  
 SI 16384  
 SF 100.6177895 MHz  
 WDW EM  
 SSB 0  
 LB 1.00 Hz  
 GB 0  
 PC 1.40
